# Supplementary material for: Identifying Novel Biomarkers Ready for Evaluation in Low-Prevalence Populations for the Early Detection of Upper Gastrointestinal Cancers: A Systematic Review
Source: Springer Nature journal article supplement (doi:10.1007/s12325-020-01571-z), 2020-12-11
Supplement: MOESM1 [file 18676486]

## Online supplementary file 1. Search strategy

1. ((gastric or stomach or oesophag\* or esophag\* or gallbladder or pancrea\* or colon or rectal or colorectal or bowel or anal or intra-abdominal or intraabdominal or biliary tract or bile duct\* or intestin\* or gastrointestinal or gastro-intestinal or gastrointestinal stromal or gastro-intestinal stromal or appendi\* or cec\* or caec\* or duoeden\* or ile\* or jejun\* or MALT) adj3 (cancer\* or neoplasm\* or tumor\* or tumour\* or carcinoma\* or lymphoma\* or squamous cell carcinoma\* or ductal adenocarcinoma or ductal carcinoma or adenocarcinoma\* or cholangiocarcinoma or malignan\*)).ti,ab.

2. ((biomarker\* or bio-marker\* or biological marker\* or marker\* or metabolite marker\* or metabolomic\* or metabolic\* or metabolite\* or microRNA\* or miRNA\* or miR or protein\* or ctDNA or circulating tumor DNA or circulating tumour DNA or cell-free DNA or DNA methylation or methylated DNA or methylat\* or antibod\* or autoantibod\* or auto-antibod\* or volatile organic compound\* or VOC\* or volatolome\* or antigen\* or blood or blood-based or serum or sera or plasma or urin\* or fecal or faecal or stool or breath or saliva\* or test or testing or analy\* or assay\* or immunoassay\* or panel\* or screen\* or microarray\*) adj6 (diagnos\* or detect\* or early detection or early diagnosis)).ti,ab.

3. (Sensitivit\* or Specificit\* or False Positive Reaction\* or False Negative Reaction\* or ROC Curve\* or Predictive Value of test\* or receiver operating characteristic or receiver operator characteristic or ROC or predictive value\* or positive predictive value\* or PPV or negative predictive value\* or NPV or false negative\* or false positive\* or true negative\* or true positive\* or accurac\* or area under the curve\* or AUC or AUCs or AUROC or AUROCs).ti,ab.

4. 1 and 2 and 3

5. limit 4 to (yr="2000 -Current" and english)
