# Supplementary material for: Identifying Novel Biomarkers Ready for Evaluation in Low-Prevalence Populations for the Early Detection of Upper Gastrointestinal Cancers: A Systematic Review
Source: Springer Nature journal article supplement (doi:10.1007/s12325-020-01571-z), 2020-12-11
Supplement: MOESM4 [file 18676486]

**Online supplementary figure 1. Types of control populations: pre-malignant and non-malignant conditions**

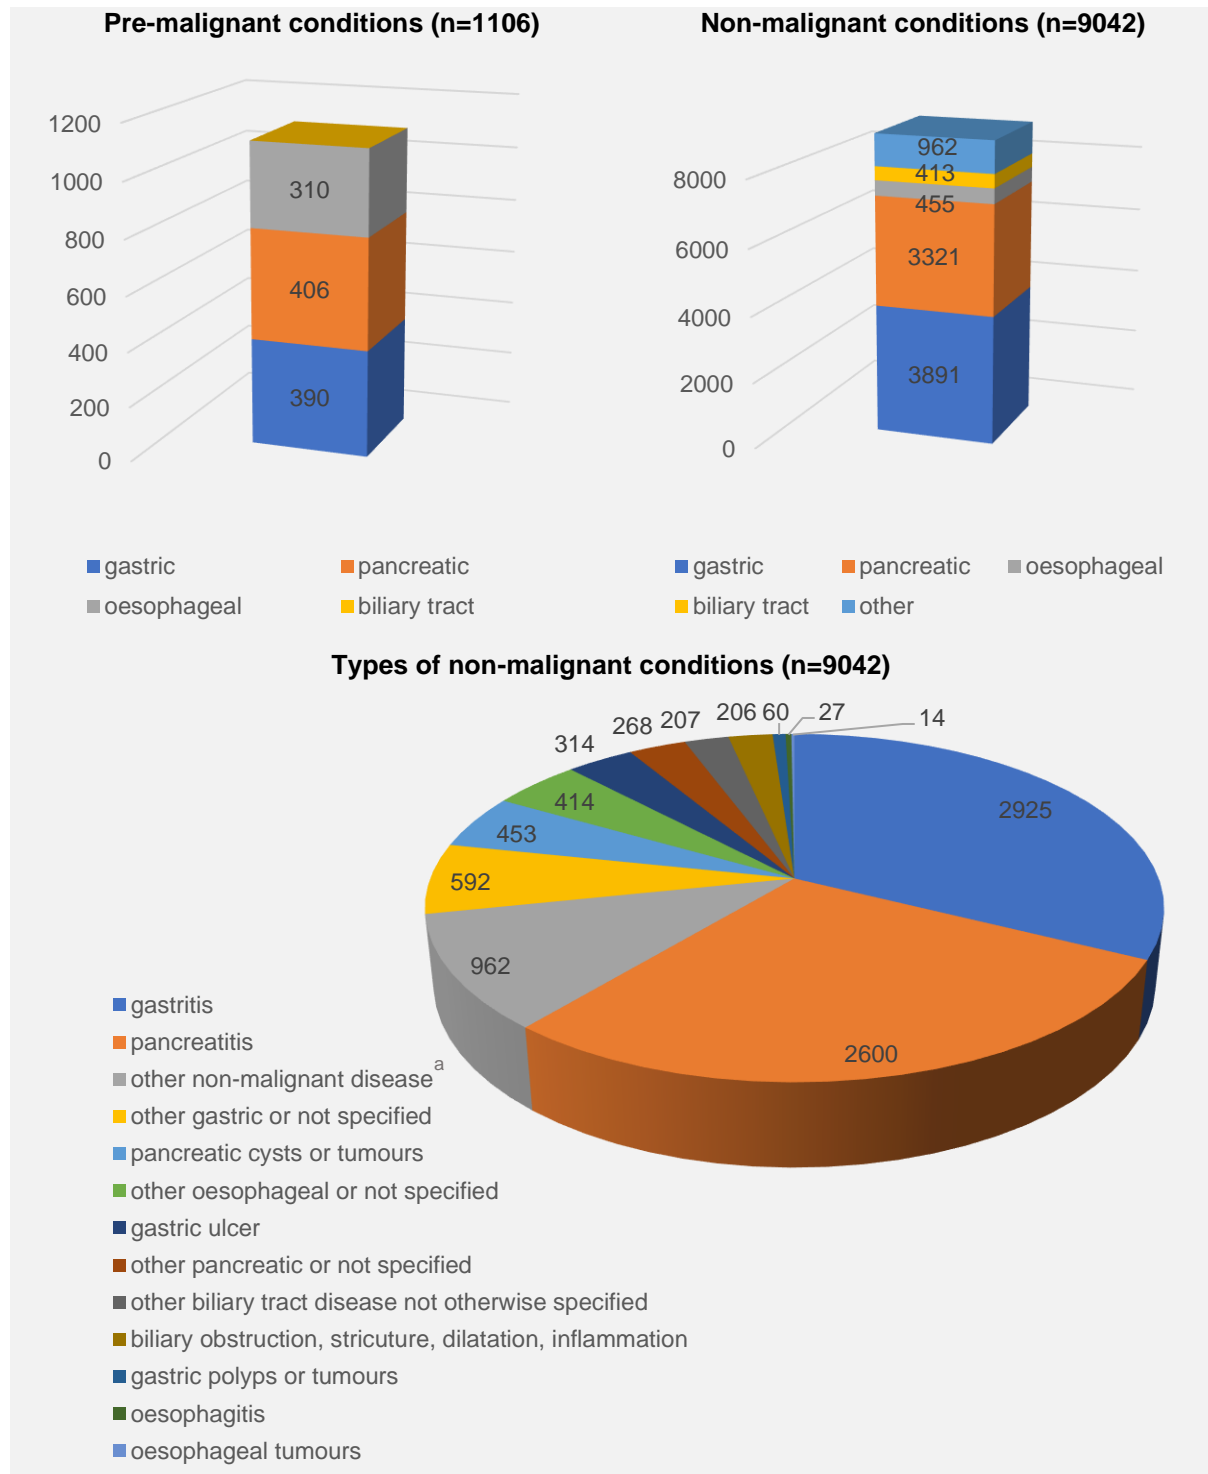

<sup>a</sup>Type 2 diabetes; chronic hepatitis B; liver cirrhosis; dyspepsia; duodenitis; duodenal ulcer; H. pylori infection; other GI disease; "stones"; haemorrhoids; benign pulmonary disease; chronic obstructive lung disease; pulmonary fibrosis; chronic bronchitis; sarcoidosis; goitre surgery; hernias; other small surgical procedures; varicose veins; chronic inflammation not specified; benign diseases not specified
