# Supplementary material for: Identifying Novel Biomarkers Ready for Evaluation in Low-Prevalence Populations for the Early Detection of Upper Gastrointestinal Cancers: A Systematic Review
Source: Springer Nature journal article supplement (doi:10.1007/s12325-020-01571-z), 2020-12-11
Supplement: MOESM6 [file 18676486]

**Online supplementary Table S2. Biomarkers identified in included studies**

| Biomarkers                                            | Subcategory    |
|-------------------------------------------------------|----------------|
| <b>Autoantibodies and other immunological markers</b> |                |
| anti-ANXA4                                            | Not applicable |
| anti-CTAG1                                            | Not applicable |
| anti-DCT                                              | Not applicable |
| anti-DDX53                                            | Not applicable |
| anti-ERBB2-C                                          | Not applicable |
| anti-FOLH1-iso1                                       | Not applicable |
| anti-FOLH1-iso7                                       | Not applicable |
| anti-GRINA                                            | Not applicable |
| anti-HP-immunoglobulin-G                              | Not applicable |
| anti-IGF2BP1                                          | Not applicable |
| anti-MAGEA4                                           | Not applicable |
| anti-P53                                              | Not applicable |
| anti-PSCA                                             | Not applicable |
| anti-SDCCAG8                                          | Not applicable |
| anti-TOPO48-autoantibody                              | Not applicable |
| anti-TP53                                             | Not applicable |
| anti-TPM3-iso3                                        | Not applicable |
| artificial-peptide-1625                               | Not applicable |
| artificial-peptide-1656                               | Not applicable |
| artificial-peptide-1743                               | Not applicable |
| artificial-peptide-1754                               | Not applicable |
| artificial-peptide-707                                | Not applicable |
| artificial-peptide-799                                | Not applicable |
| artificial-peptide-877                                | Not applicable |
| biomarker-14-3-3ξ                                     | Not applicable |
| BMI-1                                                 | Not applicable |
| C-Myc                                                 | Not applicable |
| Complement-C3                                         | Not applicable |
| Complement-C4                                         | Not applicable |
| Complement-C5                                         | Not applicable |
| CRP                                                   | Not applicable |
| CTAG2                                                 | Not applicable |
| DDX53                                                 | Not applicable |
| DKK-1-autoantibody                                    | Not applicable |
| ENO1                                                  | Not applicable |
| HCC1.4                                                | Not applicable |
| HCC-22-5                                              | Not applicable |
| HCCR                                                  | Not applicable |
| HpAb-IgG-anti-Helicobacterpylori                      | Not applicable |
| HRAS                                                  | Not applicable |
| HSP70                                                 | Not applicable |
| HSPD1                                                 | Not applicable |
| IGF2BP2                                               | Not applicable |
| IGF2BP3                                               | Not applicable |
| IgG-Gal-ratio                                         | Not applicable |
| IMP1                                                  | Not applicable |
| KM-HN-1                                               | Not applicable |
| Koc                                                   | Not applicable |
| L1ORF1                                                | Not applicable |
| Lewis-x                                               | Not applicable |
| LY6K-autoantibodies                                   | Not applicable |
| MAGEA3                                                | Not applicable |
| MDM2                                                  | Not applicable |

| Biomarkers                             | Subcategory    |
|----------------------------------------|----------------|
| MIA                                    | Not applicable |
| MIC                                    | Not applicable |
| MICA                                   | Not applicable |
| MICB                                   | Not applicable |
| MTA1                                   | Not applicable |
| MUC5AC                                 | Not applicable |
| MYC                                    | Not applicable |
| NPM1                                   | Not applicable |
| NSG1                                   | Not applicable |
| NY-ESO-1-CTAG1A                        | Not applicable |
| P16                                    | Not applicable |
| p53                                    | Not applicable |
| p62                                    | Not applicable |
| p90                                    | Not applicable |
| PAM4-Enzyme-Immunoassay                | Not applicable |
| Prx6                                   | Not applicable |
| PTEN                                   | Not applicable |
| SCC-Antigen                            | Not applicable |
| sHLA-G1-plus-sHLA-G5                   | Not applicable |
| Sialyl-Lewis-x                         | Not applicable |
| sMICA                                  | Not applicable |
| SOX2                                   | Not applicable |
| SPON1                                  | Not applicable |
| Survivin                               | Not applicable |
| TP53-ep1                               | Not applicable |
| TP53-ep2                               | Not applicable |
| <b>Circulating tumour DNA</b>          |                |
| any-screened-codons                    | Not applicable |
| HER2-gene-fragments                    | Not applicable |
| hotspot-codons-12                      | Not applicable |
| hotspot-codons-13                      | Not applicable |
| hotspot-codons-61                      | Not applicable |
| MYC-gene-fragments                     | Not applicable |
| <b>Metabolic markers</b>               |                |
| Alanine                                | Not applicable |
| ApoCIII-0                              | Not applicable |
| Asparagine                             | Not applicable |
| biomarker-5.8kDa-fibrinogen-fragment   | Not applicable |
| C16.1                                  | Not applicable |
| C18.1                                  | Not applicable |
| C18.2                                  | Not applicable |
| C18.3                                  | Not applicable |
| C20.4                                  | Not applicable |
| C22.6                                  | Not applicable |
| Calcineurin-B                          | Not applicable |
| Calcium-calmodulin-dependent-kinase-IV | Not applicable |
| Ceramide                               | Not applicable |
| CO2                                    | Not applicable |
| decanal                                | Not applicable |
| DR-70-fibrinogen-fragment              | Not applicable |
| DUPAN-2                                | Not applicable |
| Ferritin                               | Not applicable |
| Histidine                              | Not applicable |
| isocitrate                             | Not applicable |
| Isoleucine                             | Not applicable |
| LysoPC                                 | Not applicable |
| neopterin                              | Not applicable |

| Biomarkers                                                       | Subcategory    |
|------------------------------------------------------------------|----------------|
| PC-594                                                           | Not applicable |
| pentanoic-acid                                                   | Not applicable |
| phosphatidylcholine-C18.0-C22.6                                  | Not applicable |
| proline                                                          | Not applicable |
| pyruvate                                                         | Not applicable |
| Serine                                                           | Not applicable |
| Serine-threonine-protein-kinase-MARK1                            | Not applicable |
| sphinganine-1-phosphate-d18.0                                    | Not applicable |
| sphingomyelin                                                    | Not applicable |
| sphingomyelin-d17.1-C18.0                                        | Not applicable |
| sphingomyelin-d18.2-C17.0                                        | Not applicable |
| Tryptophan                                                       | Not applicable |
| Uric-acid                                                        | Not applicable |
| <b>MicroRNAs and other RNAs (including protein coding genes)</b> |                |
| ABHD3A                                                           | Not applicable |
| ABI1                                                             | Not applicable |
| AC100830.4                                                       | Not applicable |
| ACSL3                                                            | Not applicable |
| AKR1B1                                                           | Not applicable |
| ALCAM-CD166                                                      | Not applicable |
| ANXA1                                                            | Not applicable |
| ATP11B                                                           | Not applicable |
| B3GNT5                                                           | Not applicable |
| BACH1                                                            | Not applicable |
| C2orf81                                                          | Not applicable |
| CCNYL1                                                           | Not applicable |
| CD24                                                             | Not applicable |
| CENPN                                                            | Not applicable |
| CFHR3                                                            | Not applicable |
| CHI3L1                                                           | Not applicable |
| CLEC4D                                                           | Not applicable |
| COL17A1                                                          | Not applicable |
| COL18A1                                                          | Not applicable |
| CSTB                                                             | Not applicable |
| CTC-501O10.1                                                     | Not applicable |
| CXCL7                                                            | Not applicable |
| CYB5R4                                                           | Not applicable |
| DENND1B                                                          | Not applicable |
| Disks-large-homolog-1                                            | Not applicable |
| ECHDC3                                                           | Not applicable |
| EIF3G                                                            | Not applicable |
| ENA78-CXCL5                                                      | Not applicable |
| ENTPD1                                                           | Not applicable |
| ERO1A                                                            | Not applicable |
| exosomal-lncUEGC1                                                | Not applicable |
| exosomal-lncUEGC2                                                | Not applicable |
| FAM198B                                                          | Not applicable |
| FAM49B                                                           | Not applicable |
| FAR1                                                             | Not applicable |
| FGL2                                                             | Not applicable |
| FNDC3B                                                           | Not applicable |
| FOXD2-AS1                                                        | Not applicable |
| FPGT                                                             | Not applicable |
| GALNT4                                                           | Not applicable |
| H19                                                              | Not applicable |
| HEATR5A                                                          | Not applicable |
| HTATIP2                                                          | Not applicable |

| Biomarkers       | Subcategory    |
|------------------|----------------|
| IFNGR1           | Not applicable |
| IKBIP            | Not applicable |
| ITIH4            | Not applicable |
| KRT4             | Not applicable |
| KRT6A            | Not applicable |
| LDHA             | Not applicable |
| LINC00086        | Not applicable |
| LINC00152        | Not applicable |
| LINC00467        | Not applicable |
| lncRNA-AOC4P     | Not applicable |
| lncRNA-BANCR     | Not applicable |
| lncRNA-CCAT2     | Not applicable |
| lncRNA-LINC00857 | Not applicable |
| lncRNA-RINCR     | Not applicable |
| LOC100506474     | Not applicable |
| LPAR6            | Not applicable |
| MBTPS2           | Not applicable |
| MCMBP            | Not applicable |
| MIER1            | Not applicable |
| miR-1            | Not applicable |
| miR-106a         | Not applicable |
| miR-106b         | Not applicable |
| miR-106b-3p      | Not applicable |
| miR-107          | Not applicable |
| miR-10b-5p       | Not applicable |
| miR-122-5p       | Not applicable |
| miR-125b-5p      | Not applicable |
| miR-126-3p       | Not applicable |
| miR-1271         | Not applicable |
| miR-1285         | Not applicable |
| miR-1290         | Not applicable |
| MiR-1322         | Not applicable |
| miR-132-3p       | Not applicable |
| MIR140-5p        | Not applicable |
| miR-142-3p       | Not applicable |
| miR-148a         | Not applicable |
| miR-155          | Not applicable |
| miR-16           | Not applicable |
| miR-17-5p        | Not applicable |
| miR-181a         | Not applicable |
| miR-181b         | Not applicable |
| miR-181c-5p      | Not applicable |
| miR-185          | Not applicable |
| miR-185-5p       | Not applicable |
| miR-191          | Not applicable |
| miR-192-5p       | Not applicable |
| miR-193b-3p      | Not applicable |
| miR-194          | Not applicable |
| miR-195          | Not applicable |
| miR-195-5p       | Not applicable |
| miR196a          | Not applicable |
| miR-19b-3p       | Not applicable |
| miR-200a-3p      | Not applicable |
| miR-203          | Not applicable |
| miR-20a          | Not applicable |
| miR20a-3p        | Not applicable |
| miR-20b-5p       | Not applicable |

| Biomarkers   | Subcategory    |
|--------------|----------------|
| miR-21       | Not applicable |
| miR-210      | Not applicable |
| miR-214      | Not applicable |
| miR-218      | Not applicable |
| miR-221      | Not applicable |
| miR-221-3p   | Not applicable |
| miR-223      | Not applicable |
| miR223-3p    | Not applicable |
| miR-22-5p    | Not applicable |
| miR-24       | Not applicable |
| miR-25       | Not applicable |
| miR-26a      | Not applicable |
| miR-26b-3p   | Not applicable |
| miR-27a      | Not applicable |
| miR-27b-3p   | Not applicable |
| miR-28-3p    | Not applicable |
| miR-296-5p   | Not applicable |
| miR-31       | Not applicable |
| miR-3196     | Not applicable |
| miR-34       | Not applicable |
| miR-34a      | Not applicable |
| miR-375      | Not applicable |
| miR-376c     | Not applicable |
| miR-378      | Not applicable |
| miR-421      | Not applicable |
| miR-423-5p   | Not applicable |
| miR-451      | Not applicable |
| miR-485-3p   | Not applicable |
| miR-486      | Not applicable |
| miR-486-5p   | Not applicable |
| miR-663B     | Not applicable |
| miR-6794-5p  | Not applicable |
| miR-6799-5p  | Not applicable |
| miR-6807-5p  | Not applicable |
| miR-6820-5p  | Not applicable |
| miR-6856-5p  | Not applicable |
| miR-744      | Not applicable |
| miR-744-5p   | Not applicable |
| miR-7-5p     | Not applicable |
| miR-8073     | Not applicable |
| miR-92a      | Not applicable |
| miR-92b      | Not applicable |
| miR93        | Not applicable |
| miR-938      | Not applicable |
| miR-942      | Not applicable |
| miR-99a      | Not applicable |
| miRNA-146a   | Not applicable |
| mirR-19a     | Not applicable |
| NABP1-OBFC2A | Not applicable |
| NFE2L2       | Not applicable |
| OSBPL8       | Not applicable |
| PANDAR       | Not applicable |
| PPIH         | Not applicable |
| PPL          | Not applicable |
| PPP1R13L     | Not applicable |
| PRDM5        | Not applicable |
| PTPRC        | Not applicable |

| Biomarkers                   | Subcategory                            |
|------------------------------|----------------------------------------|
| RAB10                        | Not applicable                         |
| RANBP9                       | Not applicable                         |
| REG3A                        | Not applicable                         |
| RP11-210K20.5                | Not applicable                         |
| RPLP1                        | Not applicable                         |
| RRAGD                        | Not applicable                         |
| S100A10                      | Not applicable                         |
| SEMA4B                       | Not applicable                         |
| SLC22A15                     | Not applicable                         |
| SLC44A1                      | Not applicable                         |
| SLFN12                       | Not applicable                         |
| SMARCC2                      | Not applicable                         |
| SPINK7                       | Not applicable                         |
| SPP1                         | Not applicable                         |
| SRBD1                        | Not applicable                         |
| TET2                         | Not applicable                         |
| TLE2                         | Not applicable                         |
| UBE2W                        | Not applicable                         |
| UBE4A                        | Not applicable                         |
| UCA1                         | Not applicable                         |
| USP15                        | Not applicable                         |
| VPS51-C11orf2                | Not applicable                         |
| WSB1                         | Not applicable                         |
| XIST                         | Not applicable                         |
| ZEB2                         | Not applicable                         |
| ZMPSTE24                     | Not applicable                         |
| <b>Other biomarkers</b>      |                                        |
| butanal                      | Volatile organic compounds             |
| butyric-acid                 | Volatile organic compounds             |
| hexanoic-acid                | Volatile organic compounds             |
| MPV                          | platelets                              |
| NLR                          | platelets                              |
| PDW                          | platelets                              |
| PLR                          | platelets                              |
| sCD40L                       | platelets                              |
| <b>Other proteins</b>        |                                        |
| ADAM8                        | Novel Proteins                         |
| AFP                          | Classic Tumour Markers                 |
| AHSG                         | Novel Proteins                         |
| Albumin                      | Not otherwise specified                |
| AMBP                         | Novel Proteins                         |
| APOA4                        | Novel Proteins                         |
| apoAII-AT                    | Novel Proteins                         |
| apoAII-ATQ                   | Novel Proteins                         |
| APOC3                        | Novel Proteins                         |
| ApoC-I                       | Novel Proteins                         |
| apolipoprotein-A1            | Novel Proteins                         |
| Aprataxin-and-PNK-likefactor | Not otherwise specified                |
| ATG-authophagy-isoform-CRA-b | Not otherwise specified                |
| CA125                        | Classic Tumour Markers                 |
| CA153                        | Not otherwise specified                |
| CA19-9                       | Classic Tumour Markers                 |
| CA242                        | Classic Tumour Markers                 |
| CA50                         | Classic Tumour Markers                 |
| CA724                        | Classic Tumour Markers                 |
| CA727                        | Classic Tumour Markers                 |
| CathepsinD                   | Coagulation and angiogenesis molecules |

| Biomarkers                                                             | Subcategory                                           |
|------------------------------------------------------------------------|-------------------------------------------------------|
| CathepsinS                                                             | Coagulation and angiogenesis molecules                |
| CEA                                                                    | Classic Tumour Markers                                |
| CEACAM-1                                                               | Classic Tumour Markers                                |
| c-Met-protein                                                          | Coagulation and angiogenesis molecules                |
| cyclinB1                                                               | Not otherwise specified                               |
| Cyclin-dependent-kinase-2                                              | Not otherwise specified                               |
| CYFRA21-1                                                              | Classic Tumour Markers                                |
| Dickkopf-1                                                             | Not otherwise specified                               |
| Dysbindin                                                              | Not otherwise specified                               |
| EGF                                                                    | Not otherwise specified                               |
| Endothelial-lipase                                                     | Not otherwise specified                               |
| FAPa                                                                   | Not otherwise specified                               |
| FGA                                                                    | Coagulation and angiogenesis molecules                |
| f-PSA                                                                  | Classic Tumour Markers                                |
| G-17                                                                   | Hormones                                              |
| gastrin                                                                | Hormones                                              |
| G-CSF                                                                  | Cytokines, Chemokines and Insulin-like Growth Factors |
| GKN1                                                                   | Not otherwise specified                               |
| GLP1                                                                   | Not otherwise specified                               |
| GTP-binding-protein-GEM                                                | Not otherwise specified                               |
| HADH2-protein                                                          | Not otherwise specified                               |
| Haptoglobin                                                            | Novel Proteins                                        |
| HCG                                                                    | Hormones                                              |
| HSP27                                                                  | Novel Proteins                                        |
| ICAM-1                                                                 | Adhesion and Matrix Proteins                          |
| IFN-c                                                                  | Cytokines, Chemokines and Insulin-like Growth Factors |
| IGFBP2                                                                 | Cytokines, Chemokines and Insulin-like Growth Factors |
| IL-10                                                                  | Cytokines, Chemokines and Insulin-like Growth Factors |
| Il-12p70                                                               | Cytokines, Chemokines and Insulin-like Growth Factors |
| IL-13                                                                  | Cytokines, Chemokines and Insulin-like Growth Factors |
| IL-15                                                                  | Cytokines, Chemokines and Insulin-like Growth Factors |
| IL-1a                                                                  | Cytokines, Chemokines and Insulin-like Growth Factors |
| IL-1b                                                                  | Cytokines, Chemokines and Insulin-like Growth Factors |
| IL-2                                                                   | Cytokines, Chemokines and Insulin-like Growth Factors |
| IL-4                                                                   | Cytokines, Chemokines and Insulin-like Growth Factors |
| IL-6                                                                   | Cytokines, Chemokines and Insulin-like Growth Factors |
| IL-8-CXCL8                                                             | Cytokines, Chemokines and Insulin-like Growth Factors |
| Intercellular-adhesion-molecule-1                                      | Adhesion and Matrix Proteins                          |
| interferon-a                                                           | Cytokines, Chemokines and Insulin-like Growth Factors |
| Interferon-gamma                                                       | Cytokines, Chemokines and Insulin-like Growth Factors |
| IP-10-CXCL10                                                           | Cytokines, Chemokines and Insulin-like Growth Factors |
| LRG1                                                                   | Novel Proteins                                        |
| Lymphotoxin-alpha                                                      | Not otherwise specified                               |
| MCP-1-CCL2                                                             | Cytokines, Chemokines and Insulin-like Growth Factors |
| M-CSF                                                                  | Cytokines, Chemokines and Insulin-like Growth Factors |
| Membrane-associated-guanylate-kinase, WW-PDZ-domain-containingprotein1 | Adhesion and Matrix Proteins                          |
| MMP-1                                                                  | Adhesion and Matrix Proteins                          |
| MMP13                                                                  | Adhesion and Matrix Proteins                          |
| MMP-7                                                                  | Adhesion and Matrix Proteins                          |
| MMP-8                                                                  | Adhesion and Matrix Proteins                          |
| MMP-9                                                                  | Adhesion and Matrix Proteins                          |
| Myomesin-2                                                             | Not otherwise specified                               |
| NSE                                                                    | Classic Tumour Markers                                |
| olfactomedin-4-GW112-hGC-1                                             | Not otherwise specified                               |
| Osteopontin                                                            | Adhesion and Matrix Proteins                          |
| OPG-osteoprotegerin                                                    | Novel Proteins                                        |

| Biomarkers                        | Subcategory                                           |
|-----------------------------------|-------------------------------------------------------|
| PAM4-reactive-MUC1                | Not otherwise specified                               |
| peptide-molecular-weight-1468-m-z | Novel Proteins                                        |
| peptide-molecular-weight-3935-m-z | Novel Proteins                                        |
| peptide-molecularweight-7560-m-z  | Novel Proteins                                        |
| PGI                               | Novel Proteins                                        |
| PGII                              | Novel Proteins                                        |
| PhoSL-HP                          | Not otherwise specified                               |
| Plasma-protease-C1-inhibitor      | Not otherwise specified                               |
| PR-domain-zinc-finger-prot-8      | Not otherwise specified                               |
| Properdin                         | Not otherwise specified                               |
| Protein-kinase-C-zeta             | Not otherwise specified                               |
| Protein-tyrosine-kinase-6         | Not otherwise specified                               |
| PSA                               | Classic Tumour Markers                                |
| RegIV                             | Not otherwise specified                               |
| SAA                               | Novel Proteins                                        |
| SCF                               | Cytokines, Chemokines and Insulin-like Growth Factors |
| SDF-1-CXCL12                      | Cytokines, Chemokines and Insulin-like Growth Factors |
| sE-CAD                            | Adhesion and Matrix Proteins                          |
| Stathmin-1                        | Not otherwise specified                               |
| TARC                              | Cytokines, Chemokines and Insulin-like Growth Factors |
| tenascinC                         | Adhesion and Matrix Proteins                          |
| TFF1                              | Novel Proteins                                        |
| TFF2                              | Novel Proteins                                        |
| TFF3                              | Novel Proteins                                        |
| TFPI                              | Novel Proteins                                        |
| TGF-a                             | Cytokines, Chemokines and Insulin-like Growth Factors |
| THBS2                             | Coagulation and angiogenesis molecules                |
| TIMP-1                            | Adhesion and Matrix Proteins                          |
| TIMP-3                            | Adhesion and Matrix Proteins                          |
| TIMP-4                            | Adhesion and Matrix Proteins                          |
| TK1                               | Novel Proteins                                        |
| TNF-a                             | Cytokines, Chemokines and Insulin-like Growth Factors |
| TNFRSF1A                          | Not otherwise specified                               |
| TPS                               | Novel Proteins                                        |
| transthyretin                     | Novel Proteins                                        |
| TSGF                              | Novel Proteins                                        |
| TSP1                              | Coagulation and angiogenesis molecules                |
| TumorM2-PK                        | Novel Proteins                                        |
| ULBP2                             | Novel Proteins                                        |
| VEGF                              | Coagulation and angiogenesis molecules                |
| Visual-systemhomeobox-2           | Not otherwise specified                               |
| YKL-40                            | Other protein                                         |
