# Supplementary material for: Identifying Novel Biomarkers Ready for Evaluation in Low-Prevalence Populations for the Early Detection of Upper Gastrointestinal Cancers: A Systematic Review
Source: Springer Nature journal article supplement (doi:10.1007/s12325-020-01571-z), 2020-12-11
Supplement: MOESM7 [file 18676486]

**Online supplementary Table S3. Available measures of diagnostic performance**

| Author (Year)           | Diagnostic performance |     |     |     |     |    |    | Individual measures by type of control |    |    |
|-------------------------|------------------------|-----|-----|-----|-----|----|----|----------------------------------------|----|----|
|                         | Sen                    | Spe | PPV | NPV | AUC | FP | FN | HC                                     | NM | PM |
| Gastric cancer only     |                        |     |     |     |     |    |    |                                        |    |    |
| Cai et al (2013)        | ..                     | ..  | ..  | ..  | X   | .. | .. | X                                      | .. | .. |
| Chen et al (2014)       | X                      | X   | ..  | ..  | X   | .. | .. | ..                                     | X  | .. |
| Chen et al (2017)       | X                      | X   | X   | X   | ..  | .. | .. | U                                      | U  | .. |
| Chung et al (2019)      | X                      | X   | ..  | ..  | X   | .. | .. | U                                      | U  | U  |
| Ding et al (2017)       | X                      | X   | ..  | ..  | X   | X  | X  | X                                      | .. | .. |
| Dong et al (2013)       | X                      | X   | ..  | ..  | X   | .. | .. | X                                      | .. | .. |
| Gantuya et al (2019)    | X                      | X   | ..  | ..  | X   | .. | .. | ..                                     | X  | .. |
| Gwak et al (2014)       | X                      | ..  | ..  | ..  | X   | .. | .. | ..                                     | X  | .. |
| He et al (2013)         | X                      | X   | X   | X   | X   | .. | .. | ..                                     | .. | .. |
| Hoshino et al (2017)    | X                      | X   | X   | X   | ..  | X  | X  | X                                      | .. | .. |
| Huang et al (2014)      | X                      | X   | ..  | ..  | X   | .. | .. | ..                                     | .. | .. |
| Huang et al (2016)      | X                      | X   | X   | X   | X   | .. | .. | X                                      | .. | .. |
| Huang et al (2017b)     | ..                     | ..  | ..  | ..  | X   | .. | .. | X                                      | .. | .. |
| Iwasaki et al (2019)    | X                      | X   | ..  | ..  | X   | .. | .. | X                                      | .. | .. |
| Ji et al (2019)         | X                      | X   | ..  | ..  | X   | .. | .. | X                                      | .. | .. |
| Juan Cai et al (2017)   | X                      | X   | ..  | ..  | X   | .. | .. | X                                      | X  | .. |
| Kaise et al (2011)      | X                      | X   | ..  | ..  | ..  | .. | .. | X                                      | .. | .. |
| Kang et al (2008)       | X                      | X   | ..  | ..  | ..  | .. | .. | X                                      | X  | X  |
| Kikuchi et al (2011)    | X                      | X   | ..  | ..  | ..  | .. | .. | ..                                     | .. | .. |
| Kim et al (2012)        | X                      | X   | ..  | ..  | X   | .. | .. | ..                                     | .. | .. |
| Kurilovich et al (2016) | X                      | X   | X   | X   | ..  | .. | .. | ..                                     | .. | .. |
| Li et al (2012)         | X                      | X   | ..  | ..  | X   | .. | .. | X                                      | .. | .. |
| Li et al (2015)         | X                      | X   | ..  | ..  | X   | .. | .. | X                                      | .. | .. |
| Li et al (2017)         | X                      | X   | ..  | ..  | X   | X  | X  | X                                      | .. | .. |
| Li et al (2018a)        | X                      | X   | ..  | ..  | X   | .. | .. | X                                      | .. | .. |
| Li et al (2018b)        | X                      | X   | ..  | ..  | X   | .. | .. | X                                      | .. | X  |
| Lim et al (2014)        | X                      | X   | X   | X   | X   | .. | .. | ..                                     | .. | .. |
| Lim et al (2015)        | X                      | X   | ..  | ..  | X   | .. | .. | ..                                     | .. | .. |
| Lin et al (2018)        | X                      | X   | ..  | ..  | X   | .. | .. | X                                      | X  | .. |
| Liu et al (2011)        | ..                     | ..  | X   | X   | X   | .. | .. | X                                      | .. | .. |
| Liu et al (2016)        | X                      | X   | ..  | ..  | X   | .. | .. | ..                                     | .. | .. |
| Liu et al (2018)        | ..                     | ..  | ..  | ..  | X   | .. | .. | ..                                     | X  | .. |
| Meistere et al (2017)   | X                      | X   | ..  | ..  | X   | .. | .. | U                                      | U  | U  |
| Mroczo et al (2009)     | X                      | ..  | ..  | ..  | X   | .. | .. | X                                      | .. | .. |
| Ning et al (2018)       | X                      | X   | ..  | ..  | X   | .. | .. | X                                      | .. | .. |
| Oue et al (2009)        | X                      | X   | ..  | ..  | ..  | .. | .. | U                                      | U  | .. |
| Pan et al (2016)        | X                      | X   | X   | X   | X   | .. | .. | ..                                     | .. | .. |
| Park et al (2014)       | X                      | X   | X   | X   | X   | .. | .. | ..                                     | .. | .. |
| Parvae et al (2019)     | X                      | X   | ..  | ..  | X   | .. | .. | X                                      | .. | .. |
| Qin et al (2019)        | ..                     | ..  | ..  | ..  | X   | .. | .. | X                                      | .. | .. |
| Qiu et al (2016)        | X                      | X   | ..  | ..  | X   | .. | .. | X                                      | .. | .. |
| Song et al (2012)       | X                      | X   | ..  | ..  | ..  | .. | .. | ..                                     | X  | .. |
| Su et al (2007)         | X                      | X   | X   | X   | ..  | X  | X  | ..                                     | X  | .. |
| Sun et al (2017)        | X                      | X   | ..  | ..  | X   | .. | .. | ..                                     | X  | .. |
| Tsalikidis et al (2013) | X                      | X   | X   | X   | X   | .. | .. | X                                      | .. | .. |
| Wang et al (2006)       | X                      | X   | X   | X   | ..  | .. | .. | X                                      | .. | .. |
| Wang et al (2018a)      | ..                     | ..  | ..  | ..  | X   | .. | .. | X                                      | .. | .. |
| Wang et al (2018b)      | X                      | X   | X   | X   | X   | X  | .. | X                                      | .. | .. |
| Wang et al (2019)       | X                      | X   | X   | X   | X   | .. | .. | ..                                     | X  | .. |
| Werner et al (2016)     | X                      | X   | ..  | ..  | ..  | .. | .. | X                                      | .. | .. |
| Wu et al (2015)         | X                      | X   | ..  | ..  | X   | .. | .. | X                                      | .. | .. |
| Wu et al (2016)         | ..                     | ..  | ..  | ..  | X   | .. | .. | X                                      | .. | .. |
| Wu et al (2018)         | X                      | X   | X   | X   | X   | .. | .. | ..                                     | X  | .. |
| Yaoka et al (2008)      | X                      | X   | X   | ..  | ..  | .. | .. | X                                      | .. | .. |

| Author (Year)                | Diagnostic performance |     |     |     |     |    |    | Individual measures by type of control |    |    |
|------------------------------|------------------------|-----|-----|-----|-----|----|----|----------------------------------------|----|----|
|                              | Sen                    | Spe | PPV | NPV | AUC | FP | FN | HC                                     | NM | PM |
| Yang et al (2013)            | X                      | X   | ::  | ::  | X   | :: | :: | X                                      | :: | :: |
| Yang et al (2019)            | ::                     | ::  | ::  | ::  | X   | :: | :: | ::                                     | X  | :: |
| Yoon et al (2019)            | X                      | X   | X   | X   | X   | :: | X  | X                                      | :: | :: |
| Yun et al (2017)             | X                      | X   | X   | X   | X   | :: | :: | X                                      | X  | :: |
| Zayakin et al (2013)         | X                      | X   | ::  | ::  | X   | :: | :: | X                                      | X  | :: |
| Zhang et al (2014a)          | X                      | X   | ::  | ::  | X   | :: | :: | X                                      | X  | :: |
| Zhang et al (2015)           | ::                     | ::  | ::  | ::  | X   | :: | :: | ::                                     | :: | :: |
| Zhang et al (2017)           | X                      | X   | ::  | ::  | X   | X  | X  | ::                                     | :: | :: |
| Zhou et al (2015a)           | X                      | X   | ::  | ::  | X   | :: | :: | X                                      | :: | :: |
| Zhou et al (2015b)           | X                      | X   | ::  | ::  | X   | :: | :: | X                                      | :: | :: |
| Zhou et al (2015c)           | X                      | X   | ::  | ::  | X   | :: | :: | X                                      | :: | :: |
| Pancreatic cancer only       |                        |     |     |     |     |    |    |                                        |    |    |
| Akita et al (2016)           | X                      | X   | X   | X   | X   | :: | :: | X                                      | :: | :: |
| Balasenthil et al (2017)     | X                      | X   | ::  | ::  | X   | :: | :: | X                                      | X  | :: |
| Brand et al (2011)           | X                      | X   | ::  | ::  | X   | :: | :: | X                                      | X  | :: |
| Cao et al (2016)             | X                      | X   | ::  | ::  | X   | :: | :: | ::                                     | X  | X  |
| Capello et al (2017)         | X                      | X   | ::  | ::  | X   | :: | :: | X                                      | X  | X  |
| Chung et al (2011)           | X                      | X   | ::  | ::  | X   | :: | :: | ::                                     | :: | :: |
| Chung et al (2013)           | X                      | X   | ::  | ::  | X   | :: | :: | U                                      | X  | :: |
| Deng et al (2016)            | X                      | X   | X   | X   | X   | X  | X  | ::                                     | :: | :: |
| Duraker et al (2007)         | X                      | X   | ::  | ::  | ::  | :: | :: | U                                      | X  | U  |
| Firpo et al (2009)           | X                      | X   | ::  | ::  | X   | :: | :: | X                                      | X  | X  |
| Fukutake et al (2015)        | X                      | ::  | ::  | ::  | X   | :: | :: | X                                      | X  | :: |
| Gao et al (2014)             | X                      | X   | ::  | ::  | ::  | :: | :: | X                                      | X  | :: |
| Gold et al (2006)            | X                      | X   | ::  | ::  | X   | :: | :: | ::                                     | X  | :: |
| Gold et al (2013)            | X                      | X   | ::  | ::  | X   | :: | :: | X                                      | X  | :: |
| Groblewska et al (2007)      | X                      | X   | ::  | ::  | X   | :: | :: | X                                      | :: | :: |
| Guo et al (2016)             | X                      | X   | ::  | ::  | X   | :: | :: | ::                                     | X  | :: |
| Honda et al (2012)           | X                      | X   | ::  | ::  | X   | :: | :: | X                                      | X  | :: |
| Honda et al (2015)           | X                      | X   | ::  | ::  | X   | :: | :: | X                                      | :: | :: |
| Honda et al (2019)           | X                      | X   | ::  | ::  | X   | :: | :: | X                                      | :: | :: |
| Jiang et al (2004)           | X                      | X   | X   | ::  | ::  | :: | :: | ::                                     | :: | :: |
| Kaur et al (2017)            | X                      | X   | X   | X   | X   | :: | :: | X                                      | X  | :: |
| Kim et al (2017)             | X                      | X   | ::  | ::  | X   | :: | :: | X                                      | X  | X  |
| Kuwatani et al (2019)        | X                      | X   | ::  | ::  | X   | :: | :: | X                                      | X  | X  |
| LeCalvez-Kelm et al (2016)   | X                      | X   | ::  | ::  | ::  | :: | X  | X                                      | :: | :: |
| Lee et al (2019)             | X                      | ::  | ::  | ::  | X   | :: | :: | ::                                     | :: | :: |
| Liao et al (2009)            | X                      | X   | ::  | ::  | X   | :: | :: | X                                      | X  | :: |
| Liu et al (2012a)            | X                      | X   | ::  | ::  | X   | :: | :: | X                                      | X  | :: |
| Liu et al (2012b)            | X                      | X   | X   | X   | X   | :: | :: | X                                      | X  | :: |
| Liu et al (2014)             | X                      | ::  | ::  | ::  | ::  | :: | :: | ::                                     | :: | :: |
| Matsubara et al (2011)       | X                      | X   | ::  | ::  | X   | :: | :: | X                                      | :: | :: |
| Mayerle et al (2018)         | X                      | X   | X   | X   | X   | :: | :: | ::                                     | X  | :: |
| Mellby et al (2018)          | X                      | X   | ::  | ::  | X   | :: | :: | X                                      | X  | :: |
| Mizuno et al (2019)          | X                      | X   | ::  | ::  | ::  | :: | :: | X                                      | X  | :: |
| O'Brien et al (2015)         | X                      | X   | ::  | ::  | X   | X  | X  | X                                      | :: | :: |
| Park et al (2012)            | X                      | X   | X   | X   | X   | :: | :: | ::                                     | :: | :: |
| Park et al (2017)            | X                      | X   | ::  | ::  | X   | :: | :: | X                                      | X  | :: |
| Peng et al (2019)            | X                      | X   | X   | X   | X   | :: | :: | ::                                     | X  | :: |
| Poruk et al (2013)           | X                      | X   | ::  | ::  | X   | :: | :: | ::                                     | :: | :: |
| Ritchie et al (2015)         | X                      | X   | ::  | ::  | X   | :: | :: | X                                      | :: | :: |
| Rychlikova et al (2016)      | X                      | X   | ::  | ::  | X   | :: | :: | ::                                     | X  | :: |
| Sakai et al (2019)           | X                      | X   | X   | X   | ::  | :: | :: | X                                      | X  | X  |
| Song et al (2019)            | ::                     | ::  | ::  | ::  | X   | :: | :: | X                                      | X  | X  |
| Tachezy et al (2012)         | X                      | X   | ::  | ::  | X   | :: | :: | ::                                     | X  | :: |
| Talar-Wojrowska et al (2010) | X                      | X   | ::  | ::  | X   | :: | :: | ::                                     | X  | :: |
| Tavano et al (2018)          | X                      | X   | ::  | ::  | X   | :: | :: | X                                      | :: | :: |
| Ward et al (2010)            | ::                     | ::  | ::  | ::  | X   | :: | :: | ::                                     | X  | :: |

| Author (Year)                  | Diagnostic performance |     |     |     |     |    |    | Individual measures by type of control |    |    |
|--------------------------------|------------------------|-----|-----|-----|-----|----|----|----------------------------------------|----|----|
|                                | Sen                    | Spe | PPV | NPV | AUC | FP | FN | HC                                     | NM | PM |
| Xu et al (2016)                | X                      | X   | ..  | ..  | X   | .. | .. | X                                      | X  | X  |
| Zhang et al (2014b)            | X                      | X   | ..  | ..  | X   | .. | .. | X                                      | X  | .. |
| Zhang et al (2014c)            | X                      | X   | ..  | ..  | X   | .. | .. | X                                      | X  | .. |
| Zhong et al (2019)             | X                      | X   | ..  | ..  | X   | .. | .. | ..                                     | .. | .. |
| Zhou et al (2014b)             | X                      | X   | ..  | ..  | X   | .. | .. | X                                      | X  | .. |
| Zhou et al (2018a)             | X                      | X   | X   | X   | X   | .. | .. | X                                      | .. | .. |
| Zhou et al (2018b)             | X                      | X   | ..  | ..  | X   | .. | .. | X                                      | .. | .. |
| Oesophageal cancer only        |                        |     |     |     |     |    |    |                                        |    |    |
| Bagaria et al (2013b)          | X                      | ..  | ..  | X   | X   | .. | .. | X                                      | .. | .. |
| Bai et al (2017)               | X                      | X   | X   | X   | X   | .. | .. | X                                      | .. | .. |
| Bagaria et al (2015)           | X                      | ..  | ..  | X   | X   | .. | .. | X                                      | .. | .. |
| Brockmann et al (2000)         | X                      | X   | ..  | ..  | ..  | .. | .. | U                                      | U  | .. |
| Huang et al (2017a)            | ..                     | ..  | ..  | ..  | X   | .. | .. | X                                      | .. | .. |
| Jia et al (2016)               | X                      | X   | ..  | ..  | ..  | .. | .. | X                                      | .. | .. |
| Liao et al (2017)              | X                      | X   | ..  | ..  | X   | .. | .. | ..                                     | .. | .. |
| Lukaszewicz-Zajac et al (2017) | X                      | X   | X   | X   | ..  | X  | X  | X                                      | .. | .. |
| Lv et al (2016)                | ..                     | ..  | ..  | ..  | X   | .. | .. | X                                      | .. | .. |
| Pan et al (2019)               | X                      | X   | ..  | ..  | ..  | .. | .. | ..                                     | .. | .. |
| Peng et al (2016)              | X                      | X   | X   | X   | X   | .. | .. | X                                      | .. | .. |
| Sudo et al (2019)              | X                      | X   | ..  | ..  | X   | .. | .. | X                                      | X  | .. |
| Wang et al (2016)              | X                      | X   | ..  | ..  | X   | .. | .. | X                                      | .. | .. |
| Xing et al (2017)              | X                      | X   | X   | X   | X   | .. | .. | ..                                     | .. | .. |
| Xu et al (2014)                | X                      | X   | X   | X   | ..  | X  | X  | X                                      | .. | .. |
| Xu et al (2019)                | X                      | X   | X   | X   | X   | .. | .. | X                                      | .. | .. |
| Yan et al (2018)               | X                      | X   | ..  | ..  | X   | .. | .. | X                                      | .. | .. |
| Zhang et al (2011)             | X                      | X   | X   | X   | X   | .. | .. | X                                      | .. | .. |
| Zhang et al (2012)             | X                      | X   | ..  | ..  | X   | .. | .. | X                                      | .. | U  |
| Zhang et al (2013)             | X                      | X   | X   | X   | X   | .. | .. | X                                      | .. | .. |
| Zhang et al (2016)             | X                      | X   | ..  | ..  | X   | X  | .. | X                                      | .. | .. |
| Zhang et al (2018)             | X                      | X   | X   | X   | X   | .. | .. | X                                      | X  | .. |
| Zheng et al (2014)             | X                      | X   | X   | X   | X   | .. | .. | X                                      | .. | .. |
| Zhou et al (2014a)             | X                      | X   | ..  | ..  | X   | .. | .. | X                                      | .. | .. |
| Biliary tract cancer only      |                        |     |     |     |     |    |    |                                        |    |    |
| Deng et al (2017)              | X                      | X   | ..  | ..  | X   | .. | .. | ..                                     | X  | .. |
| Leelawat et al (2010)          | X                      | X   | X   | X   | X   | .. | .. | ..                                     | X  | .. |
| Wang et al (2014)              | X                      | X   | ..  | ..  | ..  | .. | .. | U                                      | U  | .. |
| More than one tumour type      |                        |     |     |     |     |    |    |                                        |    |    |
| Bagaria et al (2013a)          | X                      | X   | X   | X   | X   | .. | .. | X                                      | .. | .. |
| Markar et al (2018)            | X                      | X   | ..  | ..  | X   | .. | .. | ..                                     | .. | .. |
| Ren et al (2016)               | X                      | X   | ..  | ..  | X   | .. | .. | ..                                     | .. | .. |
| Schneider et al (2005)         | X                      | X   | ..  | ..  | X   | .. | .. | X                                      | .. | .. |

Abbreviations: AUC: area under the curve; FN: false negatives; FP: false positives; HC: healthy controls; NM: non-malignant conditions; NPV: negative predictive value; PM: pre-malignant conditions; PPV: positive predictive value; Sen: sensitivity; Spe: specificity; U: unclear
