# Supplementary material for: Identifying Novel Biomarkers Ready for Evaluation in Low-Prevalence Populations for the Early Detection of Upper Gastrointestinal Cancers: A Systematic Review
Source: Springer Nature journal article supplement (doi:10.1007/s12325-020-01571-z), 2020-12-11
Supplement: MOESM8 [file 18676486]

## Online supplementary Table S4. Identified biomarkers according to tumour type

A. How many times each biomarker was studied (N of studies)

| Biomarker                        | All studies | Pancreatic cancer | Gastric cancer | Oesophageal cancer | Biliary tract cancer |
|----------------------------------|-------------|-------------------|----------------|--------------------|----------------------|
| CA19-9                           | 58          | 35                | 20             | 4                  | ..                   |
| CEA                              | 41          | 7                 | 27             | 9                  | 2                    |
| CA125                            | 12          | 4                 | 6              | ..                 | 2                    |
| CA724                            | 12          | 1                 | 9              | 2                  | 1                    |
| PGI                              | 9           | ..                | 9              | ..                 | ..                   |
| PGII                             | 8           | ..                | 8              | ..                 | ..                   |
| AFP                              | 6           | 2                 | 3              | 1                  | ..                   |
| CYFRA21-1                        | 6           | 1                 | 1              | 4                  | ..                   |
| miR-21                           | 6           | 2                 | 3              | 1                  | ..                   |
| p53                              | 6           | ..                | 2              | 4                  | ..                   |
| TIMP-1                           | 6           | 4                 | 2              | ..                 | ..                   |
| Osteopontin                      | 5           | 3                 | 2              | ..                 | ..                   |
| CA242                            | 4           | 2                 | 1              | ..                 | 1                    |
| C-Myc                            | 4           | ..                | 2              | 2                  | ..                   |
| HSP70                            | 4           | 1                 | 1              | 2                  | ..                   |
| IL-6                             | 4           | 3                 | 1              | ..                 | ..                   |
| miR-20a                          | 4           | 1                 | 3              | ..                 | ..                   |
| miR-25                           | 4           | 2                 | 2              | ..                 | ..                   |
| miR-296-5p                       | 4           | 1                 | 2              | 1                  | ..                   |
| MMP-7                            | 4           | 1                 | ..             | 2                  | 1                    |
| p62                              | 4           | ..                | 2              | 2                  | ..                   |
| apoAII-AT                        | 3           | 3                 | ..             | ..                 | ..                   |
| apoAII-ATQ                       | 3           | 3                 | ..             | ..                 | ..                   |
| Histidine                        | 3           | 3                 | ..             | ..                 | ..                   |
| IL-8-CXCL8                       | 3           | 2                 | 1              | ..                 | ..                   |
| miR-210                          | 3           | 1                 | 2              | ..                 | ..                   |
| NSE                              | 3           | 2                 | 1              | ..                 | ..                   |
| NY-ESO-1-CTAG1A                  | 3           | ..                | ..             | 3                  | ..                   |
| P16                              | 3           | ..                | 2              | 1                  | ..                   |
| Prx6                             | 3           | ..                | 1              | 2                  | ..                   |
| SCC-Antigen                      | 3           | ..                | ..             | 3                  | ..                   |
| Alanine                          | 2           | 2                 | ..             | ..                 | ..                   |
| anti-TP53                        | 2           | ..                | 1              | 1                  | ..                   |
| APOC3                            | 2           | 1                 | 1              | ..                 | ..                   |
| Asparagine                       | 2           | 2                 | ..             | ..                 | ..                   |
| BMI-1                            | 2           | ..                | ..             | 2                  | ..                   |
| C16.1                            | 2           | 1                 | 1              | ..                 | ..                   |
| C18.1                            | 2           | 1                 | 1              | ..                 | ..                   |
| C18.2                            | 2           | 1                 | 1              | ..                 | ..                   |
| C18.3                            | 2           | 1                 | 1              | ..                 | ..                   |
| C20.4                            | 2           | 1                 | 1              | ..                 | ..                   |
| C22.6                            | 2           | 1                 | 1              | ..                 | ..                   |
| CA153                            | 2           | 1                 | 1              | ..                 | ..                   |
| CEACAM-1                         | 2           | 2                 | ..             | ..                 | ..                   |
| HCG                              | 2           | 1                 | ..             | 1                  | ..                   |
| HpAb-IgG-anti-Helicobacterpylori | 2           | ..                | 2              | ..                 | ..                   |
| IGFBP2                           | 2           | 2                 | ..             | ..                 | ..                   |
| IgG-Gal-ratio                    | 2           | 2                 | 1              | 1                  | ..                   |
| IL-13                            | 2           | 2                 | ..             | ..                 | ..                   |
| IL-4                             | 2           | 2                 | ..             | ..                 | ..                   |

| Biomarker                       | All studies | Pancreatic cancer | Gastric cancer | Oesophageal cancer | Biliary tract cancer |
|---------------------------------|-------------|-------------------|----------------|--------------------|----------------------|
| IMP1                            | 2           | ..                | ..             | 2                  | ..                   |
| Isoleucine                      | 2           | 2                 | ..             | ..                 | ..                   |
| Koc                             | 2           | ..                | ..             | 2                  | ..                   |
| MIC                             | 2           | 2                 | ..             | ..                 | ..                   |
| miR-1                           | 2           | ..                | 2              | ..                 | ..                   |
| miR-106b                        | 2           | ..                | 2              | ..                 | ..                   |
| miR-106b-3p                     | 2           | 2                 | ..             | ..                 | ..                   |
| miR-126-3p                      | 2           | 2                 | ..             | ..                 | ..                   |
| miR-1285                        | 2           | 2                 | ..             | ..                 | ..                   |
| miR-132-3p                      | 2           | ..                | 2              | ..                 | ..                   |
| miR-16                          | 2           | 2                 | ..             | ..                 | ..                   |
| miR-181b                        | 2           | 1                 | 1              | ..                 | ..                   |
| miR-185                         | 2           | 1                 | 1              | ..                 | ..                   |
| miR-192-5p                      | 2           | 1                 | ..             | 1                  | ..                   |
| miR-214                         | 2           | ..                | 2              | ..                 | ..                   |
| miR-221                         | 2           | ..                | 2              | ..                 | ..                   |
| miR-223                         | 2           | ..                | 2              | ..                 | ..                   |
| miR-26b-3p                      | 2           | 2                 | ..             | ..                 | ..                   |
| miR-27a                         | 2           | ..                | 2              | ..                 | ..                   |
| miR-31                          | 2           | ..                | 1              | 1                  | ..                   |
| miR-376c                        | 2           | ..                | 2              | ..                 | ..                   |
| miR-423-5p                      | 2           | ..                | 2              | ..                 | ..                   |
| miR-486-5p                      | 2           | 2                 | ..             | ..                 | ..                   |
| miR-744                         | 2           | ..                | 2              | ..                 | ..                   |
| miR-938                         | 2           | 2                 | ..             | ..                 | ..                   |
| MMP-1                           | 2           | 1                 | 1              | ..                 | ..                   |
| MMP-9                           | 2           | 1                 | 1              | ..                 | ..                   |
| NPM1                            | 2           | ..                | 2              | ..                 | ..                   |
| PC-594                          | 2           | 2                 | ..             | ..                 | ..                   |
| phosphatidylcholine-C18.0-C22.6 | 2           | 2                 | ..             | ..                 | ..                   |
| REG3A                           | 2           | 2                 | ..             | ..                 | ..                   |
| SCF                             | 2           | ..                | 1              | 1                  | ..                   |
| Serine                          | 2           | 2                 | ..             | ..                 | ..                   |
| TFF1                            | 2           | ..                | 2              | ..                 | ..                   |
| TFF2                            | 2           | ..                | 2              | ..                 | ..                   |
| TFF3                            | 2           | ..                | 2              | ..                 | ..                   |
| THBS2                           | 2           | 2                 | ..             | ..                 | ..                   |
| TNF-a                           | 2           | 1                 | 1              | ..                 | ..                   |
| Tryptophan                      | 2           | 2                 | ..             | ..                 | ..                   |
| VEGF                            | 2           | 2                 | ..             | ..                 | ..                   |
| ABHD3A                          | 1           | 1                 | ..             | ..                 | ..                   |
| ABI1                            | 1           | 1                 | ..             | ..                 | ..                   |
| AC100830.4                      | 1           | ..                | 1              | ..                 | ..                   |
| ACSL3                           | 1           | 1                 | ..             | ..                 | ..                   |
| ADAM8                           | 1           | ..                | 1              | ..                 | ..                   |
| AHSG                            | 1           | ..                | ..             | 1                  | ..                   |
| AKR1B1                          | 1           | 1                 | ..             | ..                 | ..                   |
| Albumin                         | 1           | 1                 | ..             | ..                 | ..                   |
| ALCAM-CD166                     | 1           | 1                 | ..             | ..                 | ..                   |
| AMBP                            | 1           | ..                | ..             | 1                  | ..                   |
| anti-ANXA4                      | 1           | ..                | 1              | ..                 | ..                   |
| anti-CTAG1                      | 1           | ..                | 1              | ..                 | ..                   |
| anti-DCT                        | 1           | ..                | 1              | ..                 | ..                   |
| anti-DDX53                      | 1           | ..                | 1              | ..                 | ..                   |
| anti-ERBB2-C                    | 1           | ..                | 1              | ..                 | ..                   |

| Biomarker                              | All studies | Pancreatic cancer | Gastric cancer | Oesophageal cancer | Biliary tract cancer |
|----------------------------------------|-------------|-------------------|----------------|--------------------|----------------------|
| anti-FOLH1-iso1                        | 1           | ..                | 1              | ..                 | ..                   |
| anti-FOLH1-iso7                        | 1           | ..                | 1              | ..                 | ..                   |
| anti-GRINA                             | 1           | ..                | 1              | ..                 | ..                   |
| anti-HP-immunoglobulin-G               | 1           | ..                | 1              | ..                 | ..                   |
| anti-IGF2BP1                           | 1           | ..                | 1              | ..                 | ..                   |
| anti-MAGEA4                            | 1           | ..                | 1              | ..                 | ..                   |
| anti-P53                               | 1           | ..                | ..             | 1                  | ..                   |
| anti-PSCA                              | 1           | ..                | 1              | ..                 | ..                   |
| anti-SDCCAG8                           | 1           | ..                | 1              | ..                 | ..                   |
| anti-TOPO48-autoantibody               | 1           | ..                | ..             | 1                  | ..                   |
| anti-TPM3-iso3                         | 1           | ..                | 1              | ..                 | ..                   |
| ANXA1                                  | 1           | ..                | 1              | ..                 | ..                   |
| any-screened-codons                    | 1           | 1                 | ..             | ..                 | ..                   |
| APOA4                                  | 1           | 1                 | ..             | ..                 | ..                   |
| ApoC-I                                 | 1           | ..                | 1              | ..                 | ..                   |
| ApoCIII-0                              | 1           | 1                 | ..             | ..                 | ..                   |
| apolipoprotein-A1                      | 1           | 1                 | ..             | ..                 | ..                   |
| Aprataxin-and-PNK-likefactor           | 1           | 1                 | ..             | ..                 | ..                   |
| artificial-peptide-1625                | 1           | ..                | 1              | ..                 | ..                   |
| artificial-peptide-1656                | 1           | ..                | 1              | ..                 | ..                   |
| artificial-peptide-1743                | 1           | ..                | 1              | ..                 | ..                   |
| artificial-peptide-1754                | 1           | ..                | 1              | ..                 | ..                   |
| artificial-peptide-707                 | 1           | ..                | 1              | ..                 | ..                   |
| artificial-peptide-799                 | 1           | ..                | 1              | ..                 | ..                   |
| artificial-peptide-877                 | 1           | ..                | 1              | ..                 | ..                   |
| ATG-authophagy-isoform-CRA-b           | 1           | ..                | ..             | 1                  | ..                   |
| ATP11B                                 | 1           | 1                 | ..             | ..                 | ..                   |
| B3GNT5                                 | 1           | 1                 | ..             | ..                 | ..                   |
| BACH1                                  | 1           | 1                 | ..             | ..                 | ..                   |
| biomarker-14-3-3ξ                      | 1           | ..                | 1              | ..                 | ..                   |
| biomarker-5.8kDa-fibrinogen-fragment   | 1           | 1                 | ..             | ..                 | ..                   |
| butanal                                | 1           | ..                | 1              | 1                  | ..                   |
| butyric-acid                           | 1           | ..                | 1              | 1                  | ..                   |
| C2orf81                                | 1           | 1                 | ..             | ..                 | ..                   |
| CA50                                   | 1           | ..                | 1              | ..                 | ..                   |
| CA727                                  | 1           | ..                | 1              | ..                 | ..                   |
| Calcineurin-B                          | 1           | 1                 | ..             | ..                 | ..                   |
| Calcium-calmodulin-dependent-kinase-IV | 1           | 1                 | ..             | ..                 | ..                   |
| CathepsinD                             | 1           | 1                 | ..             | ..                 | ..                   |
| CathepsinS                             | 1           | ..                | 1              | ..                 | ..                   |
| CCNYL1                                 | 1           | 1                 | ..             | ..                 | ..                   |
| CD24                                   | 1           | ..                | 1              | ..                 | ..                   |
| CENPN                                  | 1           | 1                 | ..             | ..                 | ..                   |
| Ceramide                               | 1           | 1                 | ..             | ..                 | ..                   |
| CFHR3                                  | 1           | 1                 | ..             | ..                 | ..                   |
| CHI3L1                                 | 1           | ..                | ..             | 1                  | ..                   |
| CLEC4D                                 | 1           | 1                 | ..             | ..                 | ..                   |
| c-Met-protein                          | 1           | ..                | 1              | ..                 | ..                   |
| CO2                                    | 1           | 1                 | ..             | ..                 | ..                   |
| COL17A1                                | 1           | 1                 | ..             | ..                 | ..                   |
| COL18A1                                | 1           | 1                 | ..             | ..                 | ..                   |
| Complement-C3                          | 1           | 1                 | ..             | ..                 | ..                   |
| Complement-C4                          | 1           | 1                 | ..             | ..                 | ..                   |

| Biomarker                 | All studies | Pancreatic cancer | Gastric cancer | Oesophageal cancer | Biliary tract cancer |
|---------------------------|-------------|-------------------|----------------|--------------------|----------------------|
| Complement-C5             | 1           | 1                 | ..             | ..                 | ..                   |
| CRP                       | 1           | 1                 | ..             | ..                 | ..                   |
| CSTB                      | 1           | ..                | 1              | ..                 | ..                   |
| CTAG2                     | 1           | ..                | 1              | ..                 | ..                   |
| CTC-501O10.1              | 1           | ..                | 1              | ..                 | ..                   |
| CXCL7                     | 1           | 1                 | ..             | ..                 | ..                   |
| CYB5R4                    | 1           | 1                 | ..             | ..                 | ..                   |
| cyclinB1                  | 1           | ..                | ..             | 1                  | ..                   |
| Cyclin-dependent-kinase-2 | 1           | 1                 | ..             | ..                 | ..                   |
| DDX53                     | 1           | ..                | 1              | ..                 | ..                   |
| decanal                   | 1           | ..                | 1              | 1                  | ..                   |
| DENND1B                   | 1           | 1                 | ..             | ..                 | ..                   |
| Dickkopf-1                | 1           | ..                | ..             | 1                  | ..                   |
| Disks-large-homolog-1     | 1           | 1                 | ..             | ..                 | ..                   |
| DKK-1-autoantibody        | 1           | ..                | ..             | 1                  | ..                   |
| DR-70-fibrinogen-fragment | 1           | 1                 | ..             | ..                 | ..                   |
| DUPAN-2                   | 1           | 1                 | ..             | ..                 | ..                   |
| Dysbindin                 | 1           | 1                 | ..             | ..                 | ..                   |
| ECHDC3                    | 1           | 1                 | ..             | ..                 | ..                   |
| EGF                       | 1           | 1                 | ..             | ..                 | ..                   |
| EIF3G                     | 1           | ..                | 1              | ..                 | ..                   |
| ENA78-CXCL5               | 1           | ..                | 1              | ..                 | ..                   |
| Endothelial-lipase        | 1           | ..                | 1              | ..                 | ..                   |
| ENO1                      | 1           | ..                | 1              | ..                 | ..                   |
| ENTPD1                    | 1           | 1                 | ..             | ..                 | ..                   |
| ERO1A                     | 1           | ..                | 1              | ..                 | ..                   |
| exosomal-lncUEGC1         | 1           | ..                | 1              | ..                 | ..                   |
| exosomal-lncUEGC2         | 1           | ..                | 1              | ..                 | ..                   |
| FAM198B                   | 1           | 1                 | ..             | ..                 | ..                   |
| FAM49B                    | 1           | 1                 | ..             | ..                 | ..                   |
| FAPa                      | 1           | ..                | ..             | 1                  | ..                   |
| FAR1                      | 1           | 1                 | ..             | ..                 | ..                   |
| Ferritin                  | 1           | 1                 | ..             | ..                 | ..                   |
| FGA                       | 1           | ..                | ..             | 1                  | ..                   |
| FGL2                      | 1           | 1                 | ..             | ..                 | ..                   |
| FNDC3B                    | 1           | 1                 | ..             | ..                 | ..                   |
| FOXD2-AS1                 | 1           | ..                | 1              | ..                 | ..                   |
| FPGT                      | 1           | 1                 | ..             | ..                 | ..                   |
| f-PSA                     | 1           | 1                 | ..             | ..                 | ..                   |
| G-17                      | 1           | ..                | 1              | ..                 | ..                   |
| GALNT4                    | 1           | 1                 | ..             | ..                 | ..                   |
| gastrin                   | 1           | ..                | 1              | ..                 | ..                   |
| G-CSF                     | 1           | 1                 | ..             | ..                 | ..                   |
| GKN1                      | 1           | ..                | 1              | ..                 | ..                   |
| GLP1                      | 1           | 1                 | ..             | ..                 | ..                   |
| GTP-binding-protein-GEM   | 1           | 1                 | ..             | ..                 | ..                   |
| H19                       | 1           | ..                | 1              | ..                 | ..                   |
| HADH2-protein             | 1           | 1                 | ..             | ..                 | ..                   |
| Haptoglobin               | 1           | 1                 | ..             | ..                 | ..                   |
| HCC1.4                    | 1           | ..                | 1              | ..                 | ..                   |
| HCC-22-5                  | 1           | ..                | 1              | ..                 | ..                   |
| HCCR                      | 1           | ..                | ..             | 1                  | ..                   |
| HEATR5A                   | 1           | 1                 | ..             | ..                 | ..                   |
| HER2-gene-fragments       | 1           | ..                | 1              | ..                 | ..                   |
| hexanoic-acid             | 1           | ..                | 1              | 1                  | ..                   |
| hotspot-codons-12         | 1           | 1                 | ..             | ..                 | ..                   |

| Biomarker                                                              | All studies | Pancreatic cancer | Gastric cancer | Oesophageal cancer | Biliary tract cancer |
|------------------------------------------------------------------------|-------------|-------------------|----------------|--------------------|----------------------|
| hotspot-codons-13                                                      | 1           | 1                 | ..             | ..                 | ..                   |
| hotspot-codons-61                                                      | 1           | 1                 | ..             | ..                 | ..                   |
| HRAS                                                                   | 1           | ..                | ..             | 1                  | ..                   |
| HSP27                                                                  | 1           | 1                 | ..             | ..                 | ..                   |
| HSPD1                                                                  | 1           | ..                | 1              | ..                 | ..                   |
| HTATIP2                                                                | 1           | 1                 | ..             | ..                 | ..                   |
| ICAM-1                                                                 | 1           | 1                 | ..             | ..                 | ..                   |
| IFN-c                                                                  | 1           | 1                 | ..             | ..                 | ..                   |
| IFNGR1                                                                 | 1           | 1                 | ..             | ..                 | ..                   |
| IGF2BP2                                                                | 1           | ..                | 1              | ..                 | ..                   |
| IGF2BP3                                                                | 1           | ..                | 1              | ..                 | ..                   |
| IKBIP                                                                  | 1           | 1                 | ..             | ..                 | ..                   |
| IL-10                                                                  | 1           | 1                 | ..             | ..                 | ..                   |
| Il-12p70                                                               | 1           | 1                 | ..             | ..                 | ..                   |
| IL-15                                                                  | 1           | 1                 | ..             | ..                 | ..                   |
| IL-1a                                                                  | 1           | 1                 | ..             | ..                 | ..                   |
| IL-1b                                                                  | 1           | 1                 | ..             | ..                 | ..                   |
| IL-2                                                                   | 1           | 1                 | ..             | ..                 | ..                   |
| Intercellular-adhesion-molecule-1                                      | 1           | 1                 | ..             | ..                 | ..                   |
| interferon-a                                                           | 1           | 1                 | ..             | ..                 | ..                   |
| Interferon-gamma                                                       | 1           | 1                 | ..             | ..                 | ..                   |
| IP-10-CXCL10                                                           | 1           | 1                 | ..             | ..                 | ..                   |
| isocitrate                                                             | 1           | 1                 | ..             | ..                 | ..                   |
| ITIH4                                                                  | 1           | ..                | ..             | 1                  | ..                   |
| KM-HN-1                                                                | 1           | ..                | 1              | ..                 | ..                   |
| KRT4                                                                   | 1           | ..                | 1              | ..                 | ..                   |
| KRT6A                                                                  | 1           | ..                | 1              | ..                 | ..                   |
| L1ORF1                                                                 | 1           | ..                | 1              | ..                 | ..                   |
| LDHA                                                                   | 1           | 1                 | ..             | ..                 | ..                   |
| Lewis-x                                                                | 1           | 1                 | ..             | ..                 | ..                   |
| LINC00086                                                              | 1           | ..                | 1              | ..                 | ..                   |
| LINC00152                                                              | 1           | ..                | 1              | ..                 | ..                   |
| LINC00467                                                              | 1           | ..                | 1              | ..                 | ..                   |
| lncRNA-AOC4P                                                           | 1           | ..                | 1              | ..                 | ..                   |
| lncRNA-BANCR                                                           | 1           | ..                | 1              | ..                 | ..                   |
| lncRNA-CCAT2                                                           | 1           | ..                | 1              | ..                 | ..                   |
| lncRNA-LINC00857                                                       | 1           | ..                | 1              | ..                 | ..                   |
| lncRNA-RINCR                                                           | 1           | ..                | 1              | ..                 | ..                   |
| LOC100506474                                                           | 1           | ..                | 1              | ..                 | ..                   |
| LPAR6                                                                  | 1           | 1                 | ..             | ..                 | ..                   |
| LRG1                                                                   | 1           | 1                 | ..             | ..                 | ..                   |
| LY6K-autoantibodies                                                    | 1           | ..                | ..             | 1                  | ..                   |
| Lymphotoxin-alpha                                                      | 1           | 1                 | ..             | ..                 | ..                   |
| LysoPC                                                                 | 1           | 1                 | ..             | ..                 | ..                   |
| MAGEA3                                                                 | 1           | ..                | 1              | ..                 | ..                   |
| MBTPS2                                                                 | 1           | 1                 | ..             | ..                 | ..                   |
| MCMBP                                                                  | 1           | 1                 | ..             | ..                 | ..                   |
| MCP-1-CCL2                                                             | 1           | 1                 | ..             | ..                 | ..                   |
| M-CSF                                                                  | 1           | 1                 | ..             | ..                 | ..                   |
| MDM2                                                                   | 1           | ..                | 1              | ..                 | ..                   |
| Membrane-associated-guanylate-kinase, WW-PDZ-domain-containingprotein1 | 1           | 1                 | ..             | ..                 | ..                   |
| MIA                                                                    | 1           | 1                 | ..             | ..                 | ..                   |
| MICA                                                                   | 1           | 1                 | ..             | ..                 | ..                   |

| Biomarker   | All studies | Pancreatic cancer | Gastric cancer | Oesophageal cancer | Biliary tract cancer |
|-------------|-------------|-------------------|----------------|--------------------|----------------------|
| MICB        | 1           | 1                 | ..             | ..                 | ..                   |
| MIER1       | 1           | 1                 | ..             | ..                 | ..                   |
| miR-106a    | 1           | ..                | 1              | ..                 | ..                   |
| miR-107     | 1           | ..                | 1              | ..                 | ..                   |
| miR-10b-5p  | 1           | ..                | 1              | ..                 | ..                   |
| miR-122-5p  | 1           | 1                 | ..             | ..                 | ..                   |
| miR-125b-5p | 1           | 1                 | ..             | ..                 | ..                   |
| miR-1271    | 1           | 1                 | ..             | ..                 | ..                   |
| miR-1290    | 1           | 1                 | ..             | ..                 | ..                   |
| MiR-1322    | 1           | ..                | ..             | 1                  | ..                   |
| MIR140-5p   | 1           | ..                | 1              | ..                 | ..                   |
| miR-142-3p  | 1           | ..                | 1              | ..                 | ..                   |
| miR-148a    | 1           | 1                 | 1              | ..                 | ..                   |
| miR-155     | 1           | 1                 | ..             | ..                 | ..                   |
| miR-17-5p   | 1           | ..                | 1              | ..                 | ..                   |
| miR-181a    | 1           | 1                 | ..             | ..                 | ..                   |
| miR-181c-5p | 1           | 1                 | ..             | ..                 | ..                   |
| miR-185-5p  | 1           | ..                | 1              | ..                 | ..                   |
| miR-191     | 1           | 1                 | ..             | ..                 | ..                   |
| miR-193b-3p | 1           | 1                 | ..             | ..                 | ..                   |
| miR-194     | 1           | ..                | 1              | ..                 | ..                   |
| miR-195     | 1           | ..                | 1              | ..                 | ..                   |
| miR-195-5p  | 1           | ..                | 1              | ..                 | ..                   |
| miR196a     | 1           | 1                 | ..             | ..                 | ..                   |
| miR-19b-3p  | 1           | 1                 | ..             | ..                 | ..                   |
| miR-200a-3p | 1           | ..                | 1              | ..                 | ..                   |
| miR-203     | 1           | ..                | 1              | ..                 | ..                   |
| miR20a-3p   | 1           | ..                | 1              | ..                 | ..                   |
| miR-20b-5p  | 1           | ..                | ..             | 1                  | ..                   |
| miR-218     | 1           | ..                | 1              | ..                 | ..                   |
| miR-221-3p  | 1           | 1                 | ..             | ..                 | ..                   |
| miR223-3p   | 1           | ..                | ..             | 1                  | ..                   |
| miR-22-5p   | 1           | ..                | 1              | ..                 | ..                   |
| miR-24      | 1           | 1                 | ..             | ..                 | ..                   |
| miR-26a     | 1           | ..                | 1              | ..                 | ..                   |
| miR-27b-3p  | 1           | 1                 | ..             | ..                 | ..                   |
| miR-28-3p   | 1           | ..                | ..             | 1                  | ..                   |
| miR-3196    | 1           | ..                | ..             | 1                  | ..                   |
| miR-34      | 1           | ..                | 1              | ..                 | ..                   |
| miR-34a     | 1           | ..                | 1              | ..                 | ..                   |
| miR-375     | 1           | ..                | ..             | 1                  | ..                   |
| miR-378     | 1           | ..                | 1              | ..                 | ..                   |
| miR-421     | 1           | ..                | 1              | ..                 | ..                   |
| miR-451     | 1           | ..                | 1              | ..                 | ..                   |
| miR-485-3p  | 1           | ..                | 1              | ..                 | ..                   |
| miR-486     | 1           | ..                | 1              | ..                 | ..                   |
| miR-663B    | 1           | 1                 | ..             | ..                 | ..                   |
| miR-6794-5p | 1           | ..                | ..             | 1                  | ..                   |
| miR-6799-5p | 1           | ..                | ..             | 1                  | ..                   |
| miR-6807-5p | 1           | ..                | 1              | ..                 | ..                   |
| miR-6820-5p | 1           | ..                | ..             | 1                  | ..                   |
| miR-6856-5p | 1           | ..                | 1              | ..                 | ..                   |
| miR-744-5p  | 1           | ..                | ..             | 1                  | ..                   |
| miR-7-5p    | 1           | 1                 | ..             | ..                 | ..                   |
| miR-8073    | 1           | ..                | ..             | 1                  | ..                   |
| miR-92a     | 1           | ..                | 1              | ..                 | ..                   |

| Biomarker                         | All studies | Pancreatic cancer | Gastric cancer | Oesophageal cancer | Biliary tract cancer |
|-----------------------------------|-------------|-------------------|----------------|--------------------|----------------------|
| miR-92b                           | 1           | ..                | 1              | ..                 | ..                   |
| miR93                             | 1           | ..                | 1              | ..                 | ..                   |
| miR-942                           | 1           | 1                 | ..             | ..                 | ..                   |
| miR-99a                           | 1           | 1                 | ..             | ..                 | ..                   |
| miRNA-146a                        | 1           | ..                | ..             | 1                  | ..                   |
| mirR-19a                          | 1           | ..                | ..             | 1                  | ..                   |
| MMP13                             | 1           | ..                | ..             | 1                  | ..                   |
| MMP-8                             | 1           | 1                 | ..             | ..                 | ..                   |
| MPV                               | 1           | ..                | 1              | ..                 | ..                   |
| MTA1                              | 1           | ..                | 1              | ..                 | ..                   |
| MUC5AC                            | 1           | 1                 | ..             | ..                 | ..                   |
| MYC                               | 1           | ..                | 1              | ..                 | ..                   |
| MYC-gene-fragments                | 1           | ..                | 1              | ..                 | ..                   |
| Myomesin-2                        | 1           | 1                 | ..             | ..                 | ..                   |
| NABP1-OBFC2A                      | 1           | 1                 | ..             | ..                 | ..                   |
| neopterin                         | 1           | 1                 | ..             | ..                 | ..                   |
| NFE2L2                            | 1           | 1                 | ..             | ..                 | ..                   |
| NLR                               | 1           | ..                | 1              | ..                 | ..                   |
| NSG1                              | 1           | ..                | ..             | 1                  | ..                   |
| olfactomedin-4-GW112-hGC-1        | 1           | ..                | 1              | ..                 | ..                   |
| OPG-osteoprotegerin               | 1           | 1                 | ..             | ..                 | ..                   |
| OSBPL8                            | 1           | 1                 | ..             | ..                 | ..                   |
| p90                               | 1           | ..                | 1              | ..                 | ..                   |
| PAM4-Enzyme-Immunoassay           | 1           | 1                 | ..             | ..                 | ..                   |
| PAM4-reactive-MUC1                | 1           | 1                 | ..             | ..                 | ..                   |
| PANDAR                            | 1           | ..                | 1              | ..                 | ..                   |
| PDW                               | 1           | ..                | 1              | ..                 | ..                   |
| pentanoic-acid                    | 1           | ..                | 1              | 1                  | ..                   |
| peptide-molecular-weight-1468-m-z | 1           | ..                | 1              | ..                 | ..                   |
| peptide-molecular-weight-3935-m-z | 1           | ..                | 1              | ..                 | ..                   |
| peptide-molecularweight-7560-m-z  | 1           | ..                | 1              | ..                 | ..                   |
| PhoSL-HP                          | 1           | 1                 | ..             | ..                 | ..                   |
| Plasma-protease-C1-inhibitor      | 1           | 1                 | ..             | ..                 | ..                   |
| PLR                               | 1           | ..                | 1              | ..                 | ..                   |
| PPIH                              | 1           | 1                 | ..             | ..                 | ..                   |
| PPL                               | 1           | ..                | 1              | ..                 | ..                   |
| PPP1R13L                          | 1           | 1                 | ..             | ..                 | ..                   |
| PRDM5                             | 1           | 1                 | ..             | ..                 | ..                   |
| PR-domain-zinc-finger-prot-8      | 1           | 1                 | ..             | ..                 | ..                   |
| proline                           | 1           | 1                 | ..             | ..                 | ..                   |
| Properdin                         | 1           | 1                 | ..             | ..                 | ..                   |
| Protein-kinase-C-zeta             | 1           | 1                 | ..             | ..                 | ..                   |
| Protein-tyrosine-kinase-6         | 1           | 1                 | ..             | ..                 | ..                   |
| PSA                               | 1           | 1                 | ..             | ..                 | ..                   |
| PTEN                              | 1           | ..                | 1              | ..                 | ..                   |
| PTPRC                             | 1           | 1                 | ..             | ..                 | ..                   |
| pyruvate                          | 1           | 1                 | ..             | ..                 | ..                   |
| RAB10                             | 1           | 1                 | ..             | ..                 | ..                   |
| RANBP9                            | 1           | ..                | 1              | ..                 | ..                   |
| RegIV                             | 1           | ..                | 1              | ..                 | ..                   |
| RP11-210K20.5                     | 1           | ..                | 1              | ..                 | ..                   |
| RPLP1                             | 1           | 1                 | ..             | ..                 | ..                   |
| RRAGD                             | 1           | 1                 | ..             | ..                 | ..                   |

| Biomarker                             | All studies | Pancreatic cancer | Gastric cancer | Oesophageal cancer | Biliary tract cancer |
|---------------------------------------|-------------|-------------------|----------------|--------------------|----------------------|
| S100A10                               | 1           | ..                | 1              | ..                 | ..                   |
| SAA                                   | 1           | 1                 | ..             | ..                 | ..                   |
| sCD40L                                | 1           | 1                 | ..             | ..                 | ..                   |
| SDF-1-CXCL12                          | 1           | ..                | 1              | ..                 | ..                   |
| sE-CAD                                | 1           | ..                | 1              | ..                 | ..                   |
| SEMA4B                                | 1           | ..                | 1              | ..                 | ..                   |
| Serine-threonine-protein-kinase-MARK1 | 1           | 1                 | ..             | ..                 | ..                   |
| sHLA-G1-plus-sHLA-G5                  | 1           | ..                | 1              | ..                 | ..                   |
| Sialyl-Lewis-x                        | 1           | 1                 | ..             | ..                 | ..                   |
| SLC22A15                              | 1           | 1                 | ..             | ..                 | ..                   |
| SLC44A1                               | 1           | 1                 | ..             | ..                 | ..                   |
| SLFN12                                | 1           | 1                 | ..             | ..                 | ..                   |
| SMARCC2                               | 1           | ..                | 1              | ..                 | ..                   |
| sMICA                                 | 1           | 1                 | ..             | ..                 | ..                   |
| SOX2                                  | 1           | ..                | 1              | ..                 | ..                   |
| sphinganine-1-phosphate-d18.0         | 1           | 1                 | ..             | ..                 | ..                   |
| sphingomyelin                         | 1           | 1                 | ..             | ..                 | ..                   |
| sphingomyelin-d17.1-C18.0             | 1           | 1                 | ..             | ..                 | ..                   |
| sphingomyelin-d18.2-C17.0             | 1           | 1                 | ..             | ..                 | ..                   |
| SPINK7                                | 1           | ..                | 1              | ..                 | ..                   |
| SPON1                                 | 1           | 1                 | ..             | ..                 | ..                   |
| SPP1                                  | 1           | ..                | ..             | 1                  | ..                   |
| SRBD1                                 | 1           | 1                 | ..             | ..                 | ..                   |
| Stathmin-1                            | 1           | ..                | ..             | 1                  | ..                   |
| Survivin                              | 1           | ..                | ..             | 1                  | ..                   |
| TARC                                  | 1           | ..                | 1              | ..                 | ..                   |
| tenascinC                             | 1           | 1                 | ..             | ..                 | ..                   |
| TET2                                  | 1           | 1                 | ..             | ..                 | ..                   |
| TFPI                                  | 1           | 1                 | ..             | ..                 | ..                   |
| TGF-a                                 | 1           | 1                 | ..             | ..                 | ..                   |
| TIMP-3                                | 1           | 1                 | ..             | ..                 | ..                   |
| TIMP-4                                | 1           | 1                 | ..             | ..                 | ..                   |
| TK1                                   | 1           | ..                | 1              | ..                 | ..                   |
| TLE2                                  | 1           | 1                 | ..             | ..                 | ..                   |
| TNFRSF1A                              | 1           | 1                 | ..             | ..                 | ..                   |
| TP53-ep1                              | 1           | ..                | 1              | ..                 | ..                   |
| TP53-ep2                              | 1           | ..                | 1              | ..                 | ..                   |
| TPS                                   | 1           | 1                 | ..             | ..                 | ..                   |
| transthyretin                         | 1           | ..                | 1              | ..                 | ..                   |
| TSGF                                  | 1           | 1                 | ..             | ..                 | ..                   |
| TSP1                                  | 1           | ..                | ..             | 1                  | ..                   |
| TumorM2-PK                            | 1           | ..                | 1              | 1                  | ..                   |
| UBE2W                                 | 1           | 1                 | ..             | ..                 | ..                   |
| UBE4A                                 | 1           | 1                 | ..             | ..                 | ..                   |
| UCA1                                  | 1           | ..                | 1              | ..                 | ..                   |
| ULBP2                                 | 1           | 1                 | ..             | ..                 | ..                   |
| Uric-acid                             | 1           | 1                 | ..             | ..                 | ..                   |
| USP15                                 | 1           | 1                 | ..             | ..                 | ..                   |
| Visual-systemhomeobox-2               | 1           | 1                 | ..             | ..                 | ..                   |
| VPS51-C11orf2                         | 1           | 1                 | ..             | ..                 | ..                   |
| WSB1                                  | 1           | 1                 | ..             | ..                 | ..                   |
| XIST                                  | 1           | ..                | 1              | ..                 | ..                   |
| YKL-40                                | 1           | ..                | ..             | 1                  | ..                   |
| ZEB2                                  | 1           | 1                 | ..             | ..                 | ..                   |
| ZMPSTE24                              | 1           | 1                 | ..             | ..                 | ..                   |



- B. Biomarkers investigated more than once, for the same tumour type, with individual measures of diagnostic performance (N of studies)

| Biomarker                         | Pancreatic cancer | Gastric cancer | Oesophageal cancer | Biliary tract cancer |
|-----------------------------------|-------------------|----------------|--------------------|----------------------|
| CA19-9                            | 31                | 18             | 4                  | ..                   |
| CEA                               | 7                 | 25             | 9                  | 2                    |
| CA125                             | 4                 | 6              | ..                 | 2                    |
| CA724                             | ..                | 9              | 2                  | ..                   |
| PGI                               | ..                | 9              | ..                 | ..                   |
| PGII                              | ..                | 8              | ..                 | ..                   |
| AFP                               | 2                 | 3              | ..                 | ..                   |
| CYFRA21-1                         | ..                | ..             | 4                  | ..                   |
| miR-21                            | ..                | 3              | ..                 | ..                   |
| p53                               | ..                | 2              | ..                 | ..                   |
| TIMP-1                            | 4                 | 2              | ..                 | ..                   |
| Osteopontin                       | 3                 | 2              | ..                 | ..                   |
| CA242                             | 2                 | ..             | ..                 | ..                   |
| NSE                               | 2                 | ..             | ..                 | ..                   |
| SCC-Antigen                       | ..                | ..             | 3                  | ..                   |
| apoAII-AT                         | 3                 | ..             | ..                 | ..                   |
| apoAII-ATQ                        | 3                 | ..             | ..                 | ..                   |
| CEACAM-1                          | 2                 | ..             | ..                 | ..                   |
| HpAb-IgG-anti-Helicobacter pylori | ..                | 2              | ..                 | ..                   |
| IGFBP2                            | 2                 | ..             | ..                 | ..                   |
| IgG-Gal-ratio                     | 2                 | ..             | ..                 | ..                   |
| MIC                               | 2                 | ..             | ..                 | ..                   |
| miR-106b                          | ..                | 2              | ..                 | ..                   |
| miR-16                            | 2                 | ..             | ..                 | ..                   |
| miR-214                           | ..                | 2              | ..                 | ..                   |
| miR-221                           | ..                | 2              | ..                 | ..                   |
| miR-223                           | ..                | 2              | ..                 | ..                   |
| miR-376c                          | ..                | 2              | ..                 | ..                   |
| miR-744                           | ..                | 2              | ..                 | ..                   |
| PC-594                            | 2                 | ..             | ..                 | ..                   |
| REG3A                             | 2                 | ..             | ..                 | ..                   |
| TFF1                              | ..                | 2              | ..                 | ..                   |
| TFF2                              | ..                | 2              | ..                 | ..                   |
| TFF3                              | ..                | 2              | ..                 | ..                   |
| THBS2                             | 2                 | ..             | ..                 | ..                   |

- C. Biomarkers investigated more than once, for the same tumour type, with individual measures of diagnostic performance, in studies adopting solely a reversed-flow design, or adopting it for at least one type of control (with measures)

| Biomarker                                                    | Pancreatic cancer | Gastric cancer | Oesophageal cancer | Biliary tract cancer |
|--------------------------------------------------------------|-------------------|----------------|--------------------|----------------------|
| <b>Solely a reversed-flow design</b>                         |                   |                |                    |                      |
| apoAII-AT                                                    | 3                 | ..             | ..                 | ..                   |
| apoAII-ATQ                                                   | 3                 | ..             | ..                 | ..                   |
| CA19-9                                                       | 6                 | ..             | ..                 | ..                   |
| PGI                                                          | ..                | 4              | ..                 | ..                   |
| PGII                                                         | ..                | 4              | ..                 | ..                   |
| <b>Reversed-flow design for at least one type of control</b> |                   |                |                    |                      |
| CA19-9                                                       | 4                 | ..             | ..                 | ..                   |
| CEA                                                          | ..                | 2              | ..                 | ..                   |
