# Supplementary material for: Identifying Novel Biomarkers Ready for Evaluation in Low-Prevalence Populations for the Early Detection of Upper Gastrointestinal Cancers: A Systematic Review
Source: Springer Nature journal article supplement (doi:10.1007/s12325-020-01571-z), 2020-12-11
Supplement: MOESM9 [file 18676486]

## Online supplementary Table S5. Studies adopting a single-gate design

A. Studies solely adopting a single-gate (reversed flow design): biomarkers reported more than once for the same tumour type and panels

| Author (Year)                                                                                                              | Cases                                                                                                                                                                                                                                                                                                                                                                                       | Controls                                                                                                                                                                                                                                                                           | Cut-off point(s)                                                                                                                                                                                                                                                                                                                                                                 | Sensitivity (% or as reported)                                                                                                                                                                                                                                                                                                                                                                                                                                                                                                                                                                                                                                                                                                                                           | Specificity (% or as reported)                | AUC                                                                                                                                                                                                                                                                                                                                                                                                |
|----------------------------------------------------------------------------------------------------------------------------|---------------------------------------------------------------------------------------------------------------------------------------------------------------------------------------------------------------------------------------------------------------------------------------------------------------------------------------------------------------------------------------------|------------------------------------------------------------------------------------------------------------------------------------------------------------------------------------------------------------------------------------------------------------------------------------|----------------------------------------------------------------------------------------------------------------------------------------------------------------------------------------------------------------------------------------------------------------------------------------------------------------------------------------------------------------------------------|--------------------------------------------------------------------------------------------------------------------------------------------------------------------------------------------------------------------------------------------------------------------------------------------------------------------------------------------------------------------------------------------------------------------------------------------------------------------------------------------------------------------------------------------------------------------------------------------------------------------------------------------------------------------------------------------------------------------------------------------------------------------------|-----------------------------------------------|----------------------------------------------------------------------------------------------------------------------------------------------------------------------------------------------------------------------------------------------------------------------------------------------------------------------------------------------------------------------------------------------------|
| <b>1. Measures of diagnostic performance available for individual biomarkers, in studies adopting a single-gate design</b> |                                                                                                                                                                                                                                                                                                                                                                                             |                                                                                                                                                                                                                                                                                    |                                                                                                                                                                                                                                                                                                                                                                                  |                                                                                                                                                                                                                                                                                                                                                                                                                                                                                                                                                                                                                                                                                                                                                                          |                                               |                                                                                                                                                                                                                                                                                                                                                                                                    |
| Apolipoprotein AII-AT/ATQ, and CA19-9 used in combination (pancreatic cancer)                                              |                                                                                                                                                                                                                                                                                                                                                                                             |                                                                                                                                                                                                                                                                                    |                                                                                                                                                                                                                                                                                                                                                                                  |                                                                                                                                                                                                                                                                                                                                                                                                                                                                                                                                                                                                                                                                                                                                                                          |                                               |                                                                                                                                                                                                                                                                                                                                                                                                    |
| Honda et al (2019) <sup>1</sup>                                                                                            | <ul style="list-style-type: none"> <li>156 PaC from EPIC cohort</li> <li>median age at diagnosis 60.9 (37.2-79.6), median age at blood draw 58.1 (34.9-75.7)</li> <li>53% male</li> <li>Staging NA; 13 localised, 73 metastatic, 69 unknown</li> <li>Measures according to months prior to diagnosis (lag times): up to six months, &gt;6-18, 18, &gt;18-36 and &gt;36-40 months</li> </ul> | <ul style="list-style-type: none"> <li>213 participants in the EPIC cohort not diagnosed with cancer (blood donors, healthy conscious, screening participants, health insurance holders)</li> <li>median age at blood draw 58.0 (34.5-75.4)</li> <li>53% male (matched)</li> </ul> | <p>Individual measures, crude values only</p> <ul style="list-style-type: none"> <li>Cut-off 1: ApoAII-AT/ATQ sensitivity at 95% specificity, 30.3 ng/ml</li> <li>Cut-off 2: ApoAII-AT/ATQ sensitivity at 98% specificity, 27.7 ng/ml</li> </ul> <p>Combination with CA19-9, crude values only</p> <ul style="list-style-type: none"> <li>CA19-9: 37 U/ml and 38 U/ml</li> </ul> | <ul style="list-style-type: none"> <li>Cut off 1: up to 6 months (m) 0.21 (0.07-0.52), &gt;6-18m 0.25 (0.11-0.47), 18m 0.24 (0.12-0.42), &gt;18-36m 0.05 (0.01-0.19), &gt;36-40m 0.07 (0.02-0.18).</li> <li>Cut-off 2: up to 6m 0.14 (0.03-0.47), &gt;6-18m 0.21 (0.08-0.46), 18m 0.19 (0.08-0.40), &gt;18-36m 0.05 (0.01-0.20), &gt;36-40m 0.04 (0.01-0.15).</li> <li>CA19-9 (37 U/ml) and ApoAII-ATQ/AT (27.7 ng/ml): up to 6m 0.57 (0.29-0.82), &gt;6-18m 0.39 (0.22-0.59), 18m 0.45 (0.30-0.61), &gt;18-36m 0.09 (0.03-0.22), &gt;36-40m 0.07 (0.02-0.16).</li> <li>CA19-9 (38 U/ml) and ApoAII-ATQ/AT (25 ng/ml): up to 6m 0.57 (0.29-0.82), &gt;6-18m 0.36 (0.19-0.56), 18m 0.43 (0.28-0.59), &gt;18-36m 0.07 (0.01-0.19), &gt;36-40m 0.07 (0.02-0.16).</li> </ul> | NA                                            | <ul style="list-style-type: none"> <li>Logistic regression model: 0.62 (0.47-0.77) at lag times ≤6m, 0.65 (0.54-0.75) &gt;6-18m, 0.53 (0.43-0.62) &gt;18m and 0.52 (0.44-0.60) &gt; 36m</li> <li>Combined CA19-9 and ApoA2-ATQ/AT in logistic regression model 0.78 (0.66-0.91) at lag times ≤6m, 0.74 (0.64-0.84) .6-18m, 0.63 (0.54-0.72) &gt;18m months and 0.56 (0.48-0.64) &gt;36m</li> </ul> |
| Honda et al (2015) <sup>2</sup>                                                                                            | <p>Cohort 1</p> <ul style="list-style-type: none"> <li>131 IDACP</li> <li>Mean age 68.8 (SD 9.01)</li> <li>55% male</li> <li>Staging: most at advanced stages</li> </ul> <p>Cohort 2</p> <ul style="list-style-type: none"> <li>155 IDACP</li> <li>Age and sex NA</li> <li>Staging: most advanced</li> </ul>                                                                                | <p>Cohort 1</p> <ul style="list-style-type: none"> <li>131 HC</li> <li>Mean age 62.5 (SD 10.8)</li> <li>52% male</li> </ul> <p>Cohort 2</p> <ul style="list-style-type: none"> <li>57 pancreatic disease other than IDACP (2)</li> <li>Age and sex NA</li> </ul>                   | <ul style="list-style-type: none"> <li>Results provided for both ELISA and mass spectrometric analysis</li> <li>ELISA: apoAII-ATQ/AT 46.3µg/ml and CA19-9 75 units/ml</li> </ul>                                                                                                                                                                                                 | <p>NA</p> <p>ApoAII-ATQ/AT + CA19-9 95.4%</p>                                                                                                                                                                                                                                                                                                                                                                                                                                                                                                                                                                                                                                                                                                                            | <p>NA</p> <p>ApoAII-ATQ/AT + CA19-9 98.3%</p> | <ul style="list-style-type: none"> <li>ApoAII-ATQ/AT (0.935 for ELISA, 0.885 for MS analysis). ApoAII-ATQ (0.427 for Elisa) and ApoAII-AT (0.856 for Elisa)</li> <li>ApoAII-ATQ/AT alone (0.944), IDACP patients vs HC.</li> </ul>                                                                                                                                                                 |

| Author (Year)                                 | Cases                                                                                                                                                                                                                                      | Controls                                                                                                                                                                                                                                                      | Cut-off point(s)                                                                                                       | Sensitivity (% or as reported)                                                                                                                                                                                                             | Specificity (% or as reported)                                                                                                                                                                                                             | AUC                                                                                                                                      |
|-----------------------------------------------|--------------------------------------------------------------------------------------------------------------------------------------------------------------------------------------------------------------------------------------------|---------------------------------------------------------------------------------------------------------------------------------------------------------------------------------------------------------------------------------------------------------------|------------------------------------------------------------------------------------------------------------------------|--------------------------------------------------------------------------------------------------------------------------------------------------------------------------------------------------------------------------------------------|--------------------------------------------------------------------------------------------------------------------------------------------------------------------------------------------------------------------------------------------|------------------------------------------------------------------------------------------------------------------------------------------|
|                                               |                                                                                                                                                                                                                                            |                                                                                                                                                                                                                                                               |                                                                                                                        |                                                                                                                                                                                                                                            |                                                                                                                                                                                                                                            | <ul style="list-style-type: none"> <li>• ApoAII-ATQ/AT alone for stage IV vs healthy controls (0.946)</li> </ul>                         |
|                                               | Cohort 3 <ul style="list-style-type: none"> <li>• 98 PaC</li> <li>• Age and sex NA</li> <li>• Staging: all early stages</li> </ul>                                                                                                         | Cohort 3 <ul style="list-style-type: none"> <li>• 62 CP, 31 acute benign biliary obstruction, 61 HC</li> <li>• Age and sex NA</li> </ul>                                                                                                                      |                                                                                                                        | NA                                                                                                                                                                                                                                         | NA                                                                                                                                                                                                                                         | <ul style="list-style-type: none"> <li>• Linear combination of log-transformed CA19-9 and apoAII-ATQ/AT, 0.879 (0.823–0.930).</li> </ul> |
| Honda et al (2012) <sup>3a</sup>              | Cohort 1 <ul style="list-style-type: none"> <li>• 103 PDAC</li> <li>• mean age 61.5</li> <li>• 53% male</li> <li>• Does not meet criteria as used to calculate first measures of performance</li> </ul>                                    | Cohort 1 <ul style="list-style-type: none"> <li>• 112 HC</li> <li>• mean age 61.3 (SD 13.0)</li> <li>• 50% male</li> <li>• Does not meet criteria as used to calculate first measures of performance</li> </ul>                                               | • NA                                                                                                                   | • Does not meet criteria                                                                                                                                                                                                                   | • Does not meet criteria                                                                                                                                                                                                                   | • Does not meet criteria                                                                                                                 |
|                                               | Cohort 2 <ul style="list-style-type: none"> <li>• 62 PaC</li> <li>• mean age 63.3 (8.34)</li> <li>• 61% male</li> <li>• Staging NA</li> </ul>                                                                                              | Cohort 2 <ul style="list-style-type: none"> <li>• 41 HC (does not meet criteria)</li> <li>• mean 61.5 (11.2)</li> <li>• 56% male</li> </ul>                                                                                                                   | • NA                                                                                                                   | • Does not meet criteria                                                                                                                                                                                                                   | • Does not meet criteria                                                                                                                                                                                                                   | • Does not meet criteria as less than 50 controls                                                                                        |
|                                               | Cohort 3 <ul style="list-style-type: none"> <li>• 52 PaC</li> <li>• Mean age 63.1 (9.85)</li> <li>• 56% male</li> <li>• Staging NA</li> </ul>                                                                                              | Cohort 3 <ul style="list-style-type: none"> <li>• 53 HC and 58 CP</li> <li>• HC mean 39.1 (15.6), CP 50.3 (8.9)</li> <li>• HC 59% male, CP 74% male</li> </ul>                                                                                                | • NA                                                                                                                   | • N/A                                                                                                                                                                                                                                      | • N/A                                                                                                                                                                                                                                      | • Cohort 3, cancer vs healthy 0.958 (0.920-0.996) (ApoAII-2)                                                                             |
|                                               | Cohort 4 <ul style="list-style-type: none"> <li>• 249 PDAC and 18 other malignant tumour of the pancreas</li> <li>• PDAC mean age 64.4 (9.11), other 68.3 (9.74)</li> <li>• PDAC 59% male, other 67% male</li> <li>• Staging NA</li> </ul> | Cohort 4 <ul style="list-style-type: none"> <li>• 128 HC, 38 benign tumour or cyst and 14 CP</li> <li>• HC mean 46.6 (16.8), benign tumour or cyst 63.5 (11.0), CP 60.2 (10.2)</li> <li>• HC 65% male, benign tumour or cyst 45% male, CP 86% male</li> </ul> | • NA                                                                                                                   | <ul style="list-style-type: none"> <li>• 93.39% (ApoAII-2+CIII-0 and CA19-9) – all tumour stages</li> <li>• 94.20% (ApoAII-2+CIII-0 and CA19-9) – stage III only</li> <li>• 91.60% (ApoAII-2+CIII-0 and CA19-9) – stage IV only</li> </ul> | <ul style="list-style-type: none"> <li>• 93.22% (ApoAII-2+CIII-0 and CA19-9) – all tumour stages</li> <li>• 93.22% (ApoAII-2+CIII-0 and CA19-9) – stage III only</li> <li>• 93.22% (ApoAII-2+CIII-0 and CA19-9) – stage IV only</li> </ul> | • Cohort 4: only available combining ApoAII-2 with ApoCIII-0 (not shown)                                                                 |
| <b>Pepsinogen (PGI/PGII) (gastric cancer)</b> |                                                                                                                                                                                                                                            |                                                                                                                                                                                                                                                               |                                                                                                                        |                                                                                                                                                                                                                                            |                                                                                                                                                                                                                                            |                                                                                                                                          |
| Gantuya et al (2019) <sup>4</sup>             | <ul style="list-style-type: none"> <li>• 50 GC (54% H pylori prevalence)</li> <li>• No information on age and sex</li> <li>• Staging NA</li> </ul>                                                                                         | <ul style="list-style-type: none"> <li>• 752 non-cancer patients (302 antrum limited CG and/or atrophy and 450 corpus CG and/or atrophy (77% H. pylori prevalence)</li> <li>• Mean age: 53.8 (SD 1, 27-78)</li> <li>• 31% male</li> </ul>                     | <ul style="list-style-type: none"> <li>• PG I/II &lt; 2.2 and PGI &lt; 28ng/mL were the best cut-off points</li> </ul> | <ul style="list-style-type: none"> <li>• PGI: 70%</li> <li>• PG I/II: 66%</li> </ul>                                                                                                                                                       | <ul style="list-style-type: none"> <li>• PGI: 70%</li> <li>• PG I/II: 65.1%</li> </ul>                                                                                                                                                     | <ul style="list-style-type: none"> <li>• PGI: 0.76 (0.68-0.84)</li> <li>• PGI/II: 0.70 (0.62-0.77)</li> </ul>                            |
| Kang et al (2008) <sup>5</sup>                | <ul style="list-style-type: none"> <li>• 380 GC (intestinal and diffuse type)</li> </ul>                                                                                                                                                   | <ul style="list-style-type: none"> <li>• 172 BGU, 119 DU, 107 dysplasia</li> </ul>                                                                                                                                                                            | <ul style="list-style-type: none"> <li>• PG I ≤ 70 ng/mL</li> <li>• PG I/II ratio ≤ 3.0</li> </ul>                     | <ul style="list-style-type: none"> <li>• PG I: intestinal type 77.7%, diffuse type 64.7%.</li> </ul>                                                                                                                                       | <ul style="list-style-type: none"> <li>• PG I: intestinal type 20.2%, diffuse type 20.2%.</li> </ul>                                                                                                                                       | NA                                                                                                                                       |

| Author (Year)                                                                                                                                                              | Cases                                                                                                                                                                              | Controls                                                                                                                                                                       | Cut-off point(s)                                                                                                                                                                                                                                                                                                                                                                                                                               | Sensitivity (% or as reported)                                                                                                                                                                                                                                                                                                                                                                                                                                                                                                                                                                                                                                                                                                                                                                                                                                                                                                | Specificity (% or as reported)                                                                                                                                                                                                                                                                                                                                                                                                                                                                                                                                                                                                                                                                                                                                                                                                                                                                                        | AUC                                                                             |
|----------------------------------------------------------------------------------------------------------------------------------------------------------------------------|------------------------------------------------------------------------------------------------------------------------------------------------------------------------------------|--------------------------------------------------------------------------------------------------------------------------------------------------------------------------------|------------------------------------------------------------------------------------------------------------------------------------------------------------------------------------------------------------------------------------------------------------------------------------------------------------------------------------------------------------------------------------------------------------------------------------------------|-------------------------------------------------------------------------------------------------------------------------------------------------------------------------------------------------------------------------------------------------------------------------------------------------------------------------------------------------------------------------------------------------------------------------------------------------------------------------------------------------------------------------------------------------------------------------------------------------------------------------------------------------------------------------------------------------------------------------------------------------------------------------------------------------------------------------------------------------------------------------------------------------------------------------------|-----------------------------------------------------------------------------------------------------------------------------------------------------------------------------------------------------------------------------------------------------------------------------------------------------------------------------------------------------------------------------------------------------------------------------------------------------------------------------------------------------------------------------------------------------------------------------------------------------------------------------------------------------------------------------------------------------------------------------------------------------------------------------------------------------------------------------------------------------------------------------------------------------------------------|---------------------------------------------------------------------------------|
|                                                                                                                                                                            | <ul style="list-style-type: none"> <li>Age and sex not available for cases separately</li> <li>No information on staging</li> </ul>                                                | <ul style="list-style-type: none"> <li>Age and sex not available for controls separately</li> </ul>                                                                            |                                                                                                                                                                                                                                                                                                                                                                                                                                                | <ul style="list-style-type: none"> <li>PG I/II: intestinal type 62.3%, diffuse type 55.8%</li> </ul>                                                                                                                                                                                                                                                                                                                                                                                                                                                                                                                                                                                                                                                                                                                                                                                                                          | <ul style="list-style-type: none"> <li>PG I/II: intestinal type 61.0%, diffuse type 61.0%</li> </ul>                                                                                                                                                                                                                                                                                                                                                                                                                                                                                                                                                                                                                                                                                                                                                                                                                  |                                                                                 |
| Kikuchi et al (2011) <sup>6</sup>                                                                                                                                          | <ul style="list-style-type: none"> <li>122 GC</li> <li>Age: 68.2 years (41-87, SD 9.7)</li> <li>74% male</li> <li>Staging NA</li> </ul>                                            | <ul style="list-style-type: none"> <li>16 GU or DU, 17 superficial gastritis, 66 CAG, 79 no abnormality</li> <li>Age: 56.2 years (22-82, SD 14.9)</li> <li>55% male</li> </ul> | <ul style="list-style-type: none"> <li>Conventional PG: PG I <math>\leq</math> 70 ng/ml and PG I/II ratio <math>\leq</math> 3.</li> <li>Strict PG: PG I <math>\leq</math> 30 ng/ml and PG I/II ratio <math>\leq</math> 2</li> </ul>                                                                                                                                                                                                            | <ul style="list-style-type: none"> <li>Conventional PG: 77.9%, strict PG:41.3%, Normal and non-malignant conditions combined</li> </ul>                                                                                                                                                                                                                                                                                                                                                                                                                                                                                                                                                                                                                                                                                                                                                                                       | <ul style="list-style-type: none"> <li>Conventional PG: 61.8%, strict PG:90.4% Normal and non-malignant conditions combined</li> </ul>                                                                                                                                                                                                                                                                                                                                                                                                                                                                                                                                                                                                                                                                                                                                                                                | NA                                                                              |
| Yanaoka et al (2008) <sup>7b</sup>                                                                                                                                         | <ul style="list-style-type: none"> <li>63 GC</li> <li>Age: 50.3-51.8 (mean range)</li> <li>100% male</li> <li>86% early, 14% late stages</li> </ul>                                | <ul style="list-style-type: none"> <li>5146 HC</li> <li>Mean age: 49.2 <math>\pm</math> 4.7</li> <li>100% male</li> </ul>                                                      | <ul style="list-style-type: none"> <li><math>\leq</math>70 ng/mL and PG I/II ratio of <math>\leq</math>3.0 (1),</li> <li><math>\leq</math>50 ng/mL and PG I/II ratio of <math>\leq</math>3.0 (2),</li> <li><math>\leq</math>30 ng/mL and PG I/II ratio of <math>\leq</math>2.0 (3)</li> </ul>                                                                                                                                                  | <ul style="list-style-type: none"> <li>Cut-off 1: 58.7% (45.6-70.8%).</li> <li>Cut-off 2: 49.2% (36.5-62.0%)</li> <li>Cut-off 3: <math>\leq</math>2.0: 27.0% (16.9-39.9%).</li> </ul>                                                                                                                                                                                                                                                                                                                                                                                                                                                                                                                                                                                                                                                                                                                                         | <ul style="list-style-type: none"> <li>Cut-off 1: 73.4% (72.1-74.6%).</li> <li>Cut-off 2: 80.5% (79.4-81.6%)</li> <li>Cut-off 3: <math>\leq</math>2.0: 92.0% (91.3-92.8%).</li> </ul>                                                                                                                                                                                                                                                                                                                                                                                                                                                                                                                                                                                                                                                                                                                                 | NA                                                                              |
| <b>2. Measures of diagnostic performance available for established biomarkers combined with novel biomarkers not shown above, in studies adopting a single-gate design</b> |                                                                                                                                                                                    |                                                                                                                                                                                |                                                                                                                                                                                                                                                                                                                                                                                                                                                |                                                                                                                                                                                                                                                                                                                                                                                                                                                                                                                                                                                                                                                                                                                                                                                                                                                                                                                               |                                                                                                                                                                                                                                                                                                                                                                                                                                                                                                                                                                                                                                                                                                                                                                                                                                                                                                                       |                                                                                 |
| CA19-9 (pancreatic cancer)                                                                                                                                                 |                                                                                                                                                                                    |                                                                                                                                                                                |                                                                                                                                                                                                                                                                                                                                                                                                                                                |                                                                                                                                                                                                                                                                                                                                                                                                                                                                                                                                                                                                                                                                                                                                                                                                                                                                                                                               |                                                                                                                                                                                                                                                                                                                                                                                                                                                                                                                                                                                                                                                                                                                                                                                                                                                                                                                       |                                                                                 |
| O'Brien et al (2015) <sup>8</sup>                                                                                                                                          | <ul style="list-style-type: none"> <li>101 PaC</li> <li>Age NA for validation cohort</li> <li>100% female</li> <li>Staging NA</li> </ul>                                           | <ul style="list-style-type: none"> <li>184 HC</li> <li>Age not available for validation cohort</li> <li>100% female</li> </ul>                                                 | <ul style="list-style-type: none"> <li>CA19-9 <math>&gt;</math>25 U/mL; <math>&gt;</math>30 U/mL; <math>&gt;</math>37 U/mL and <math>&gt;</math>40 U/mL – in combination with CA125 <math>&gt;</math>20 U/mL; <math>&gt;</math>25 U/mL; <math>&gt;</math>30 U/mL</li> <li>Measures reported according to time to diagnosis: 0-4 years, 0-2 years; 1-4 years</li> <li>Measures reported for restricted set (removing serial samples)</li> </ul> | <ul style="list-style-type: none"> <li>0-4: CA19-9 (<math>&gt;</math>25) or CA125 (<math>&gt;</math>20) 50.0%; CA19-9 (<math>&gt;</math>30) or CA125 (<math>&gt;</math>25) 39.9%; CA19-9 (<math>&gt;</math>37) or CA125 (<math>&gt;</math>30) 30.4%; CA19-9 (<math>&gt;</math>40) or CA125 (<math>&gt;</math>25) 31.9%.</li> <li>0-2: CA19-9 (<math>&gt;</math>25) or CA125 (<math>&gt;</math>20) 53.1%; CA19-9 (<math>&gt;</math>30) or CA125 (<math>&gt;</math>25) 46.9%; CA19-9 (<math>&gt;</math>37) or CA125 (<math>&gt;</math>30) 40.6%; CA19-9 (<math>&gt;</math>40) or CA125 (<math>&gt;</math>25) 37.5%.</li> <li>1-4: CA19-9 (cut-off<math>&gt;</math>25) or CA125 (<math>&gt;</math>20) 45.4%; CA19-9 (<math>&gt;</math>30) or CA125 (<math>&gt;</math>25) 34.3%; CA19-9 (<math>&gt;</math>37) or CA125 (<math>&gt;</math>30) 23.1%; CA19-9 (<math>&gt;</math>40) or CA125 (<math>&gt;</math>25) 25.9%.</li> </ul> | <ul style="list-style-type: none"> <li>0-4: CA19-9 (<math>&gt;</math>25) or CA125 (<math>&gt;</math>20) 73.8%; CA19-9 (<math>&gt;</math>30) or CA125 (<math>&gt;</math>25) 89.1%; CA19-9 (<math>&gt;</math>37) or CA125 (<math>&gt;</math>30) 91.3%; CA19-9 (<math>&gt;</math>40) or CA125 (<math>&gt;</math>25) 91.3%.</li> <li>0-2: CA19-9 (<math>&gt;</math>25) or CA125 (<math>&gt;</math>20) 71.6%; CA19-9 (<math>&gt;</math>30) or CA125 (<math>&gt;</math>25) 89.5%; CA19-9 (<math>&gt;</math>37) or CA125 (<math>&gt;</math>30) 90.5%; CA19-9 (<math>&gt;</math>40) or CA125 (<math>&gt;</math>25) 92.6%</li> <li>1-4: CA19-9 (<math>&gt;</math>25) or CA125 (<math>&gt;</math>20) 73.8%; CA19-9 (<math>&gt;</math>30) or CA125 (<math>&gt;</math>25) 89.2%; CA19-9 (<math>&gt;</math>37) or CA125 (<math>&gt;</math>30) 91.5%; CA19-9 (<math>&gt;</math>40) or CA125 (<math>&gt;</math>25) 90.8%.</li> </ul> | NA for validation set                                                           |
| Tavano et al (2018) <sup>9</sup>                                                                                                                                           | <ul style="list-style-type: none"> <li>74 PaC</li> <li>Median age 69 (61-76)</li> <li>54% male</li> <li>Staging NA for validation cohort (majority late stages overall)</li> </ul> | <ul style="list-style-type: none"> <li>117 HC</li> <li>Median age 62 (55-70)</li> <li>45% male</li> </ul>                                                                      | <ul style="list-style-type: none"> <li>CA 19-9 36 U/mL – in combination with miR-1290 (610 number of copies/ul)</li> </ul>                                                                                                                                                                                                                                                                                                                     | <ul style="list-style-type: none"> <li>Combined: 83.8%</li> </ul>                                                                                                                                                                                                                                                                                                                                                                                                                                                                                                                                                                                                                                                                                                                                                                                                                                                             | <ul style="list-style-type: none"> <li>Combined: 96.6%</li> </ul>                                                                                                                                                                                                                                                                                                                                                                                                                                                                                                                                                                                                                                                                                                                                                                                                                                                     | <ul style="list-style-type: none"> <li>Combined: 0.923 (0.876-0.969)</li> </ul> |

| Author (Year)                                                                                                    | Cases                                                                                                                                                                                                                                                    | Controls                                                                                                                                                                                                                      | Cut-off point(s)                                                                                                                                                                                                                                                                   | Sensitivity (% or as reported)                                                                                                                                                                                                                                                                                                                                                                                                                                              | Specificity (% or as reported)                                                                                                                                                                                                                                                                                                                                                                                                                                  | AUC                                                                                                                                                                                                                                                                                                                                                                                                                                                             |
|------------------------------------------------------------------------------------------------------------------|----------------------------------------------------------------------------------------------------------------------------------------------------------------------------------------------------------------------------------------------------------|-------------------------------------------------------------------------------------------------------------------------------------------------------------------------------------------------------------------------------|------------------------------------------------------------------------------------------------------------------------------------------------------------------------------------------------------------------------------------------------------------------------------------|-----------------------------------------------------------------------------------------------------------------------------------------------------------------------------------------------------------------------------------------------------------------------------------------------------------------------------------------------------------------------------------------------------------------------------------------------------------------------------|-----------------------------------------------------------------------------------------------------------------------------------------------------------------------------------------------------------------------------------------------------------------------------------------------------------------------------------------------------------------------------------------------------------------------------------------------------------------|-----------------------------------------------------------------------------------------------------------------------------------------------------------------------------------------------------------------------------------------------------------------------------------------------------------------------------------------------------------------------------------------------------------------------------------------------------------------|
| Zhou et al (2014) <sup>10</sup>                                                                                  | <ul style="list-style-type: none"> <li>• 152 PaC</li> <li>• Mean age 56 (SD 13.5)</li> <li>• 67% male</li> <li>• Staging: 5 IA, 12 IB, 36 IIA, 20 IIB, 40 III, 39 IV</li> </ul>                                                                          | <ul style="list-style-type: none"> <li>• 96 HC, 91 CP, 20 pre-malignancies</li> <li>• Mean age: HC 58 (7.6), CP 58 (15.0), pre-malignancies 60 (11.3)</li> <li>• HC 75% male; CP 57% male; pre-malignancy 75% male</li> </ul> | <ul style="list-style-type: none"> <li>• CA19-9 in combination with ULBP2 and MIC</li> <li>• Optimum cut-offs (determined by ROC analysis): CA19-9 18.44 U/ml, ULBP2 94.08 pg/ml and MIC-1 642.83 pg/ml</li> </ul>                                                                 | <ul style="list-style-type: none"> <li>• NA for combination</li> </ul>                                                                                                                                                                                                                                                                                                                                                                                                      | <ul style="list-style-type: none"> <li>• NA for combination</li> </ul>                                                                                                                                                                                                                                                                                                                                                                                          | <ul style="list-style-type: none"> <li>• PaC vs CP (PaC vs HC not available in combination): MIC-1 + ULBP2 + CA 19-9: 0.982; MIC-1 + CA 19-9: 0.932; ULBP-1 + CA 19-9: 0.953</li> </ul>                                                                                                                                                                                                                                                                         |
| <b>3. Measures of diagnostic performance available for a panel only in studies adopting a single-gate design</b> |                                                                                                                                                                                                                                                          |                                                                                                                                                                                                                               |                                                                                                                                                                                                                                                                                    |                                                                                                                                                                                                                                                                                                                                                                                                                                                                             |                                                                                                                                                                                                                                                                                                                                                                                                                                                                 |                                                                                                                                                                                                                                                                                                                                                                                                                                                                 |
| Different panels (pancreatic cancer) <sup>c</sup>                                                                |                                                                                                                                                                                                                                                          |                                                                                                                                                                                                                               |                                                                                                                                                                                                                                                                                    |                                                                                                                                                                                                                                                                                                                                                                                                                                                                             |                                                                                                                                                                                                                                                                                                                                                                                                                                                                 |                                                                                                                                                                                                                                                                                                                                                                                                                                                                 |
| Balaseenthil et al (2017) <sup>11</sup>                                                                          | <ul style="list-style-type: none"> <li>• 98 PaC (52 with no diabetes or pancreatitis)</li> <li>• Age and sex not available</li> <li>• Staging: 7 IA, 8 IB, 1 II, 40 IIA and 42 IIB</li> </ul>                                                            | <ul style="list-style-type: none"> <li>• 62 chronic pancreatitis, 31 acute biliary obstruction, 61 healthy (50 with no diabetes or pancreatitis)</li> <li>• Age and sex not available</li> </ul>                              | <ul style="list-style-type: none"> <li>• Optimal cut-offs defined by logistic regression, for the panel (TFPI+TNC-FN III-C+CA19-9)</li> <li>• Risk score (RS) determined using a formula</li> <li>• Optimal cut-off: 5.79. Panel with CA19-9 alone optimal cut-off 1.12</li> </ul> | <ul style="list-style-type: none"> <li>• cancer (all stages) vs healthy controls: 0.75 (0.65-0.83)</li> <li>• cancer (stage I-II only) vs healthy controls: 0.73 (0.6-0.84)</li> <li>• cancer (all stages) vs chronic pancreatitis: 0.75 (0.65-0.83)</li> <li>• cancer (stage I-II only) vs chronic pancreatitis: 0.73 (0.62-0.84)</li> <li>• cancer (all stages) with no diabetes or pancreatitis vs healthy with no diabetes or pancreatitis: 0.81 (0.69-0.90)</li> </ul> | <ul style="list-style-type: none"> <li>• cancer (all stages) vs healthy controls: 0.82 (0.71-0.90)</li> <li>• cancer (stage I-II only) vs healthy controls: 0.82 (0.72-0.90)</li> <li>• cancer (all stages) vs chronic pancreatitis: 0.71 (0.60-0.82)</li> <li>• cancer (stage I-II only) vs chronic pancreatitis: 0.71 (0.60-0.81)</li> <li>• cancer with no diabetes or pancreatitis vs healthy with no diabetes or pancreatitis: 0.84 (0.72-0.94)</li> </ul> | <ul style="list-style-type: none"> <li>• cancer (all stages) vs healthy controls: 0.83 (0.76-0.89)</li> <li>• cancer (stage I-II only) vs healthy controls: 0.79 (0.70-0.87)</li> <li>• cancer (all stages) vs chronic pancreatitis: 0.78 (0.71-0.85)</li> <li>• cancer (stage I-II only) vs chronic pancreatitis: 0.75 (0.65-0.84)</li> <li>• cancer with no diabetes or pancreatitis vs healthy with no diabetes or pancreatitis: 0.89 (0.82-0.95)</li> </ul> |
| Mellby et al (2018) <sup>12</sup>                                                                                | <ul style="list-style-type: none"> <li>• 2 cohorts; only one for validation (US cohort)</li> <li>• 143 PaC</li> <li>• Median age only by staging; range (overall) 24-87</li> <li>• 57% male</li> <li>• Staging: 15 I, 75 II, 15 III and 38 IV</li> </ul> | <ul style="list-style-type: none"> <li>• 219 HC, 57 CP</li> <li>• HC median age 63.0 (24-86), CP 55.5 (32-81)</li> <li>• HC 53% male, CP 46% male</li> </ul>                                                                  | <ul style="list-style-type: none"> <li>• 29 panel signature without any established biomarkers used in combination (CA19-9 was analysed but not retained)</li> </ul>                                                                                                               | <ul style="list-style-type: none"> <li>• Panel only: 95% for stages I and II</li> </ul>                                                                                                                                                                                                                                                                                                                                                                                     | <ul style="list-style-type: none"> <li>• Panel only: 93% for stages I and II</li> </ul>                                                                                                                                                                                                                                                                                                                                                                         | <ul style="list-style-type: none"> <li>• Panel only: PaC stages I and II vs HC: 0.963 (0.94 - 0.98), on the basis of the three training sets; Chronic Pancreatitis vs patients with PaC stage I and II: 0.84</li> </ul>                                                                                                                                                                                                                                         |

<sup>a</sup>Outcomes available by staging, but as N by staging was not available eligibility was uncertain and data were not extracted. <sup>b</sup>PPVs were also provided: Cut-off 1: 2.6% (1.9-3.6%); Cut-off 2: 3.0% (2.1-4.3%); cut-off 3: 4.0% (2.4-6.4%). Abbreviations: ACG: atrophic chronic gastritis; ApoAII-AT/ATQ: apolipoprotein AII-AT/ATQ; BGU: benign gastric ulcer; DU: duodenal ulcer; CG: Chronic gastritis; CP: chronic pancreatitis; EPIC: European Prospective Investigation into Cancer and Nutrition; GC: gastric cancer; GU: gastric ulcer; IDACP: invasive ductal adenocarcinoma of pancreas; MIC: macrophage-inhibitory cytokine 1; MPV: mean platelet volume; NA: not available; PaC: pancreatic cancer; PDAC: pancreatic ductal adenocarcinoma; PDW: platelet distribution width; PGI/II: serum pepsinogen I/II; TFPI: plasma tissue factor pathway inhibitor; NTC-FN III-C: tenascin-C; ULBP2: UL16 binding protein 2. <sup>c</sup>Leelawat et al 2010 also adopted a reversed-flow design but was not added as it was the only study investigating CA19-9 for cholangiocarcinoma.

B. Studies adopting a hybrid design with a reversed-flow design (either confirmed or likely) for at least one control, with measures: biomarkers reported more than once

| Author (Year)                         | Cases                                                                                                                                                                                          | Controls                                                                                                                                                                                                                                                                                                                                                                 | Cut-off point(s)                                                                                                                                                                                                                               | Sensitivity (% or as reported)                                                                                                                                                                                                  | Specificity (%)                                                                                                                                                                                                                 | AUC                                                                                                                                                                                                                                        |
|---------------------------------------|------------------------------------------------------------------------------------------------------------------------------------------------------------------------------------------------|--------------------------------------------------------------------------------------------------------------------------------------------------------------------------------------------------------------------------------------------------------------------------------------------------------------------------------------------------------------------------|------------------------------------------------------------------------------------------------------------------------------------------------------------------------------------------------------------------------------------------------|---------------------------------------------------------------------------------------------------------------------------------------------------------------------------------------------------------------------------------|---------------------------------------------------------------------------------------------------------------------------------------------------------------------------------------------------------------------------------|--------------------------------------------------------------------------------------------------------------------------------------------------------------------------------------------------------------------------------------------|
| CA19-9 (pancreatic cancer)            |                                                                                                                                                                                                |                                                                                                                                                                                                                                                                                                                                                                          |                                                                                                                                                                                                                                                |                                                                                                                                                                                                                                 |                                                                                                                                                                                                                                 |                                                                                                                                                                                                                                            |
| Duraker et al (2007)                  | <ul style="list-style-type: none"> <li>123 PaC (with and without obstructive jaundice)</li> <li>Age and sex not available</li> <li>Staging NA; 17 resectable, 106 unresectable</li> </ul>      | <ul style="list-style-type: none"> <li>58 benign pancreatic diseases (with and without obstructive jaundice)</li> <li>Age and sex not available</li> </ul>                                                                                                                                                                                                               | <ul style="list-style-type: none"> <li>CA19-9 37 U/ml and 29 U/ml (two different kits), combined with CEA: 5 ng/ml</li> <li>CA 125: 35 U/ml and 26/ml (two different kits)</li> </ul>                                                          | <ul style="list-style-type: none"> <li>CEA or CA 19-9 86.2; CEA or CA125 64.2; CA 19-9 or CA125 91.9; CEA + CA 19-9 34.1; CEA + CA125 30.9; CA 19-9 + CA125 46.3; CEA + CA 19-9 + CA 125 26.8</li> </ul>                        | <ul style="list-style-type: none"> <li>CEA or CA 19-9 72.4; CEA or CA125 70.7; CA 19-9 or CA125 60.3 ; CEA + CA 19-9 94.8; CEA + CA125 98.3; CA 19-9 + CA125 93.1 ; CEA + CA 19-9 + CA 125 98.3</li> </ul>                      | <ul style="list-style-type: none"> <li>NA</li> </ul>                                                                                                                                                                                       |
| Firpo et al (2009) <sup>13</sup>      | <ul style="list-style-type: none"> <li>75 PaC</li> <li>Median age 69 (range 48-92)</li> <li>61% male</li> <li>Staging: 1 IA, 3 IB, 7 IIA, 24 IIB, 17 III, 23 IV</li> </ul>                     | <ul style="list-style-type: none"> <li>150 HC, 32 CP, 42 benign neoplasm and periampullary lesions, and other benign periampullary lesions</li> <li>HC median age 66 (30-94), CP 50 (32-77), benign neoplasm and periampullary lesions 70.5 (41-91). NA other</li> <li>HC 61% male, CP 53% male, benign neoplasm and periampullary lesions 48% male, NA other</li> </ul> | <ul style="list-style-type: none"> <li>CA19-9: 54.54 U/ml - in combination with haptoglobin 2821.5 ng/ml and SAA 68.445 ng/ml (derived from classification three algorithm that did not include healthy controls)</li> </ul>                   | <ul style="list-style-type: none"> <li>Panel only: PaC vs benign neoplasms 81.3%; PaC vs CP 81.3%; PaC vs healthy controls 81.3%; PaC vs combined controls 81.3%</li> </ul>                                                     | <ul style="list-style-type: none"> <li>Panel only: PaC vs benign neoplasms 88.1%; PaC vs CP 90.6%; PaC vs healthy controls 98.7%; PaC vs combined controls 95.5%</li> </ul>                                                     | <ul style="list-style-type: none"> <li>NA for combination</li> </ul>                                                                                                                                                                       |
| Liu et al (2012) <sup>14</sup>        | <ul style="list-style-type: none"> <li>138 PaC patients</li> <li>Mean age 61.8 (SD 10.6)</li> <li>64% male</li> <li>Staging: 27 I; 39 II; 17 III and 55 IV</li> </ul>                          | <ul style="list-style-type: none"> <li>107 CP, 68 HC</li> <li>CP mean age 48.6 (14.0), HC 60.5 (11.3)</li> <li>CP 66% male, HC 66% male</li> </ul>                                                                                                                                                                                                                       | <ul style="list-style-type: none"> <li>Combination of CA19-9 (cut-off &gt;37 U/mL) with miR-16 and miR-196a using logistic regression</li> <li>Formula to calculate miRNAs relative abundance - cel-miR-39 as the internal standard</li> </ul> | <ul style="list-style-type: none"> <li>Combinations only (miRNA panel and CA19-9):</li> <li>PCa vs normal: 92.0% (87.5–96.5).</li> <li>PCa vs CP: 87.7% (82.2–93.2)</li> <li>PCa vs CP and normal: 87.7% (82.2–93.2)</li> </ul> | <ul style="list-style-type: none"> <li>Combinations only (miRNA panel and CA19-9):</li> <li>PCa vs normal: 95.6% (90.7–100.0)</li> <li>PCa vs CP: 96.3% (92.7–99.9)</li> <li>PCa vs CP and normal: 97.7% (95.5–99.9)</li> </ul> | <ul style="list-style-type: none"> <li>Combinations only (miRNA panel and CA19-9):</li> <li>PCa vs normal: 0.979, p &lt; 0.000).</li> <li>PCa vs CP: 0.956, p &lt; 0.000).</li> <li>PCa vs CP and normal: 0.952, p &lt; 0.000).</li> </ul> |
| Rychlikova et al (2016) <sup>15</sup> | <ul style="list-style-type: none"> <li>64 PaC patients</li> <li>Age not available</li> <li>58% male</li> <li>Staging: 10 II, 24 III and 29 IV</li> </ul>                                       | <ul style="list-style-type: none"> <li>71 CP, 66 T2DM, 48 HC (37 CP also had DM)</li> <li>Age and sex not available</li> </ul>                                                                                                                                                                                                                                           | <ul style="list-style-type: none"> <li>CA 19-9 (cut-off 29 kU/L) - combined with osteopontin (cut-off 102 ng/ml)</li> <li>Combination: cut-off value of 3.77</li> </ul>                                                                        | <ul style="list-style-type: none"> <li>Combination for PaC vs CP: 83%</li> </ul>                                                                                                                                                | <ul style="list-style-type: none"> <li>Combination for PaC vs CP: 89%</li> </ul>                                                                                                                                                | <ul style="list-style-type: none"> <li>Combination for PaC vs CP: 0.88 ± 0.03</li> </ul>                                                                                                                                                   |
| CEA (gastric cancer)                  |                                                                                                                                                                                                |                                                                                                                                                                                                                                                                                                                                                                          |                                                                                                                                                                                                                                                |                                                                                                                                                                                                                                 |                                                                                                                                                                                                                                 |                                                                                                                                                                                                                                            |
| Li et al (2018) <sup>16</sup>         | <ul style="list-style-type: none"> <li>Model building (met eligibility)</li> <li>176 GC</li> <li>Age and sex not available</li> <li>Staging: 63 early stage and 113 advanced stage)</li> </ul> | <ul style="list-style-type: none"> <li>Model building (met eligibility)</li> <li>117 atypical hyperplasia, 204 HC.</li> <li>Age and sex not available.</li> </ul>                                                                                                                                                                                                        | <ul style="list-style-type: none"> <li>CEA (cut-off 3.45) - in combination with CA724 (cut-off 5.80), IL-6 (cut-off 20.31), IL-8 (cut-off 1.45) and TNF-α (cut-off 7.82)</li> </ul>                                                            | NA                                                                                                                                                                                                                              | NA                                                                                                                                                                                                                              | <ul style="list-style-type: none"> <li>GC vs HC 0.95 (0.93-0.97). Early-stage GC vs HC: 0.95 (0.92- 0.98). Advanced-stage GC vs HC: 0.95 (0.92- 0.97),</li> </ul>                                                                          |

| Author (Year)                   | Cases                                                                                                                                                                                 | Controls                                                                                                                                                                             | Cut-off point(s)                                                                                           | Sensitivity (% or as reported)                                                                                                                                                                                  | Specificity (%)                                                                                                                                                                                              | AUC                                                                                                                                                                                      |
|---------------------------------|---------------------------------------------------------------------------------------------------------------------------------------------------------------------------------------|--------------------------------------------------------------------------------------------------------------------------------------------------------------------------------------|------------------------------------------------------------------------------------------------------------|-----------------------------------------------------------------------------------------------------------------------------------------------------------------------------------------------------------------|--------------------------------------------------------------------------------------------------------------------------------------------------------------------------------------------------------------|------------------------------------------------------------------------------------------------------------------------------------------------------------------------------------------|
|                                 |                                                                                                                                                                                       |                                                                                                                                                                                      | <ul style="list-style-type: none"> <li>Combinations used binary logistic regression</li> </ul>             |                                                                                                                                                                                                                 |                                                                                                                                                                                                              | <ul style="list-style-type: none"> <li>GC vs atypical hyperplasia did not include CEA in panel.</li> </ul>                                                                               |
|                                 | <ul style="list-style-type: none"> <li>Further validation (independent study)</li> <li>58 GC</li> <li>Age and sex not available</li> <li>Staging: 19 early and 39 advanced</li> </ul> | <ul style="list-style-type: none"> <li>Further validation (independent study)</li> <li>41 atypical hyperplasia, 66 HC.</li> <li>Age and sex not available</li> </ul>                 |                                                                                                            | <ul style="list-style-type: none"> <li>GC vs healthy controls 89.66%. Early-stage GC vs HC: 84.21%. Advanced-stage GC vs HC: 92.31%</li> <li>GC vs atypical hyperplasia did not include CEA in panel</li> </ul> | <ul style="list-style-type: none"> <li>GC vs healthy controls 92.42%. Early-stage GC vs HC: 90.91%. Advanced-stage GC vs HC: 90.91%</li> <li>GC vs atypical hyperplasia did not have CEA in panel</li> </ul> | NA                                                                                                                                                                                       |
| Yun et al (2017) <sup>17a</sup> | <ul style="list-style-type: none"> <li>194 GC</li> <li>Mean age 54.7 (SD 9.7), range 28-77</li> <li>61% male</li> <li>Staging: 99 I/II, 95 III/IV</li> </ul>                          | <ul style="list-style-type: none"> <li>185 HC, 191 GU</li> <li>HC mean age 54.7 (9.7), range 50-72. GU mean age 54.9 (5.2), range 35-71</li> <li>HC 56% male, GU 58% male</li> </ul> | <ul style="list-style-type: none"> <li>CEA in combination with MPV, PDW, CEA. Cut-off values NA</li> </ul> | <ul style="list-style-type: none"> <li>GC vs HC: CEA+MPV 0.820; CEA+PDW 0.835. GC vs GU: CEA+MPV 0.851; CEA+PDW 0.990</li> </ul>                                                                                | <ul style="list-style-type: none"> <li>GC vs HC: CEA+MPV 0.838; CEA+PDW 0.908. GC vs GU: CEA+MPV 0.770; CEA+PDW 0.979</li> </ul>                                                                             | <ul style="list-style-type: none"> <li>GC vs HC: CEA+MPV 0.889 (0.854-0.919); CEA+PDW 0.939 (0.910-0.961). GC vs GU: CEA+MPV 0.876 (0.839-0.907); CEA+PDW 0.996 (0.984-1.000)</li> </ul> |

<sup>a</sup>Both PPVs and NPVs were also provided: PPVs: GC vs HC: CEA+MPV 0.841; CEA+PDW 0.905. GC vs GU: CEA+MPV 0.789; CEA+PDW 0.980. NPVs: NPV: GC vs HC: CEA+MPV 0.816; CEA+PDW 0.840. GC vs GU: CEA+MPV 0.835; CEA+PDW 0.989. Abbreviations: CP: chronic pancreatitis; GC: gastric cancer; GU: gastric ulcer; MPV: mean platelet volume; NA: not available. PaC: pancreatic cancer; PDW: platelet distribution width; SAA: serum amyloid A.

## References:

1. Honda K, Katzke VA, Husing A, et al. CA19-9 and apolipoprotein-A2 isoforms as detection markers for pancreatic cancer: a prospective evaluation. *Int J Cancer*. 2019;144(8):1877-87.
2. Honda K, Kobayashi M, Okusaka T, et al. Plasma biomarker for detection of early stage pancreatic cancer and risk factors for pancreatic malignancy using antibodies for apolipoprotein-All isoforms. *Sci Rep*. 2015;5:15921.
3. Honda K, Okusaka T, Felix K, et al. Altered Plasma Apolipoprotein Modifications in Patients with Pancreatic Cancer: Protein Characterization and Multi-Institutional Validation. *PLoS One*. 2012;7 (10) (no pagination)(e46908).
4. Gantuya B, Oyuntsetseg K, Bolor D, et al. Evaluation of serum markers for gastric cancer and its precursor diseases among high incidence and mortality rate of gastric cancer area. *Gastric Cancer*. 2019;22(1):104-12.
5. Kang JM, Kim N, Yoo JY, et al. The role of serum pepsinogen and gastrin test for the detection of gastric cancer in Korea. *Helicobacter*. 2008;13(2):146-56.
6. Kikuchi R, Abe Y, Iijima K, et al. Low serum levels of pepsinogen and gastrin 17 are predictive of extensive gastric atrophy with high-risk of early gastric cancer. *Tohoku J Exp Med*. 2011;223(1):35-44.
7. Yanaoka K, Oka M, Mukoubayashi C, et al. Cancer high-risk subjects identified by serum pepsinogen tests: outcomes after 10-year follow-up in asymptomatic middle-aged males. *Cancer Epidemiol Biomarkers Prev*. 2008;17(4):838-45.
8. O'Brien DP, Sandanayake NS, Jenkinson C, et al. Serum CA19-9 is significantly upregulated up to 2 years before diagnosis with pancreatic cancer: implications for early disease detection. *Clin Cancer Res*. 2015;21(3):622-31.
9. Tavano F, Gioffreda D, Valvano MR, et al. Droplet digital PCR quantification of miR-1290 as a circulating biomarker for pancreatic cancer. *Sci Rep*. 2018;8(1):16389.
10. Zhou YF, Xu LX, Huang LY, et al. Combined detection of serum UL16-binding protein 2 and macrophage inhibitory cytokine-1 improves early diagnosis and prognostic prediction of pancreatic cancer. *Oncol Lett*. 2014;8(5):2096-102.
11. Balasenthil S, Huang Y, Liu S, et al. A Plasma Biomarker Panel to Identify Surgically Resectable Early-Stage Pancreatic Cancer. *J Natl Cancer Inst*. 2017;109(8):01.
12. Mellby LD, Nyberg AP, Johansen JS, et al. Serum Biomarker Signature-Based Liquid Biopsy for Diagnosis of Early-Stage Pancreatic Cancer. *J Clin Oncol*. 2018;36(28):2887-94.
13. Firpo MA, Gay DZ, Granger SR, et al. Improved diagnosis of pancreatic adenocarcinoma using haptoglobin and serum amyloid A in a panel screen. *World J Surg*. 2009;33(4):716-22.
14. Liu J, Gao J, Du Y, et al. Combination of plasma microRNAs with serum CA19-9 for early detection of pancreatic cancer. *Int J Cancer*. 2012;131(3):683-91.
15. Rychlíková J, Vecka M, Jáchymová M, et al. Osteopontin as a discriminating marker for pancreatic cancer and chronic pancreatitis. *Cancer Biomark*. 2016;17(1):55-65.
16. Li J, Xu L, Run ZC, et al. Multiple cytokine profiling in serum for early detection of gastric cancer. *World J Gastroenterol*. 2018;24(21):2269-78.
17. Yun ZY, Li N, Zhang X, et al. Mean platelet volume, platelet distribution width and carcinoembryonic antigen to discriminate gastric cancer from gastric ulcer. *Oncotarget*. 2017;8(37):62600-5.
